# Supplementary material
Source: PubMed Central journal article supplement (PMC3984375)
Supplement: NIHMS554241-supplement-1.pdf [file NIHMS554241-supplement-1.pdf]

## Supplementary Figures

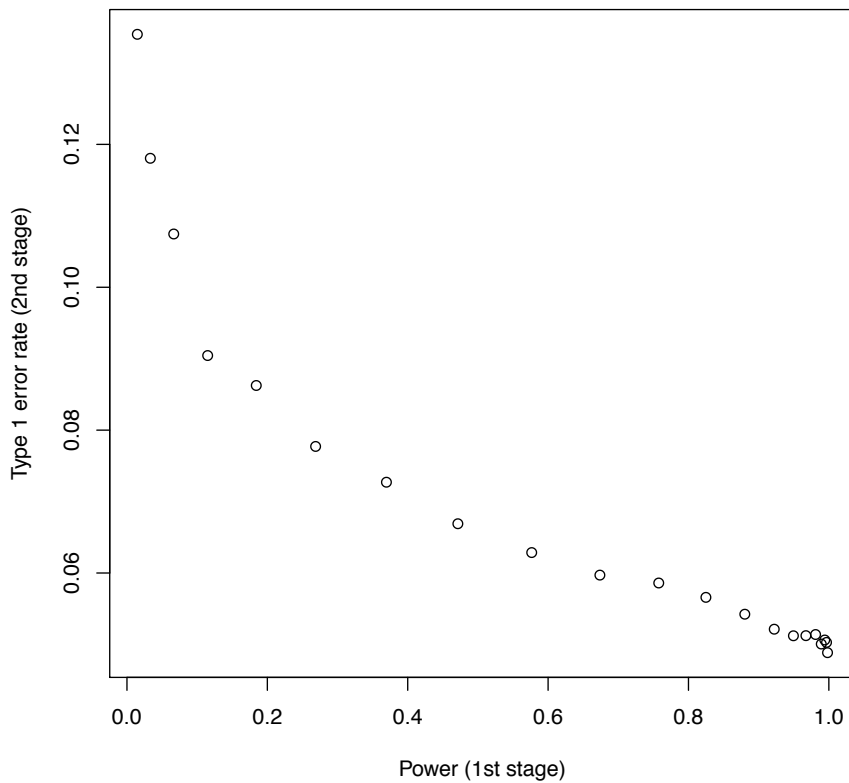

Figure S1: **Type 1 error rate of two stage design assuming a null model of one large additive effect and no epistasis** In stage 1 SNPs are tested for full genetic effects (8 d.f.) and those that surpass a threshold for multiple testing are then tested for significant interaction terms in stage 2. These interaction  $p$ -values are then adjusted (Bonferroni) for the total number of tests that passed stage 1. The type 1 error rate of this two stage design is dependent on the power, which is not known empirically.

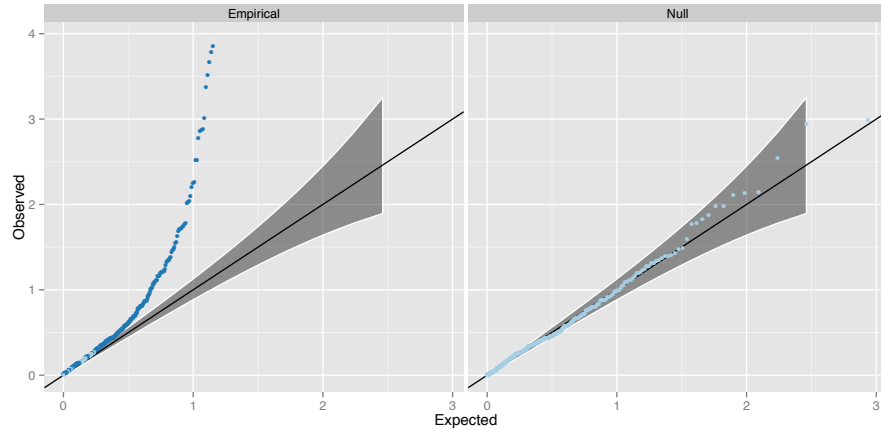

Figure S2: **Q-Q plots of interaction  $p$ -values from replication datasets, excluding the 30 points significant at the Bonferroni level** The right panel (Null) shows the interaction  $p$ -values from a meta analysis across two independent datasets on 434 SNP pairs where one SNP has a marginal effect. The left panel (Empirical) shows the interaction  $p$ -values from the 404 putative interactions that were not significant at the Bonferroni correction threshold. Dark blue points represent  $p$ -values that surpass the 2.5% FDR level, as in Figure 2.

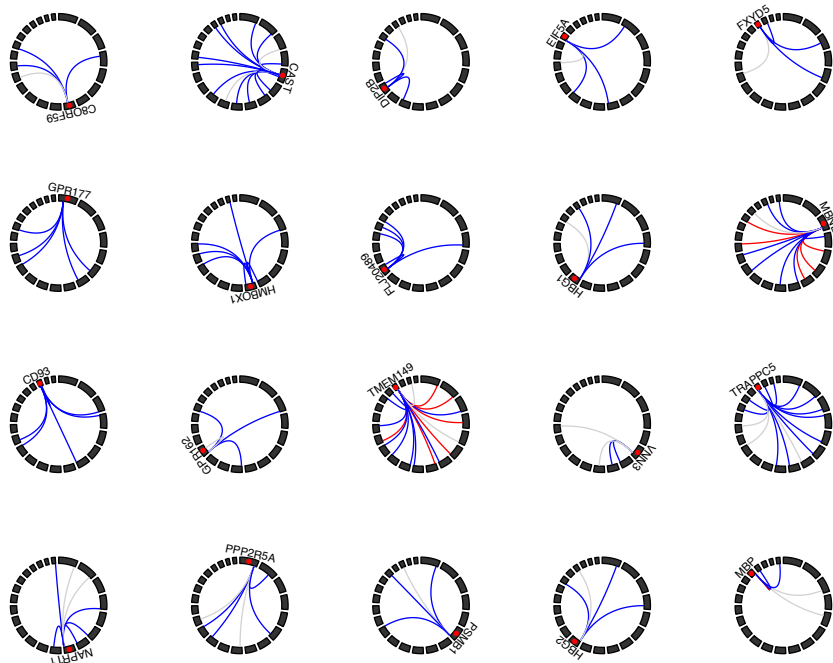

Figure S3: **Gene expression traits with four or more genetic interactions** Circle plots represent the genomic positions for SNPs (linking lines) and expression probes (red points). Chromosomes are represented by black blocks and ordered from 1 to 22 clockwise, starting from the top. Grey lines represent no evidence for replication, blue lines denote interactions that are outside the 97.5% confidence interval or the Q-Q plot (Figure 2), and red lines denote replication at the Bonferroni correction level. Most interactions are characterised as being *cis-trans* to the expression probe.

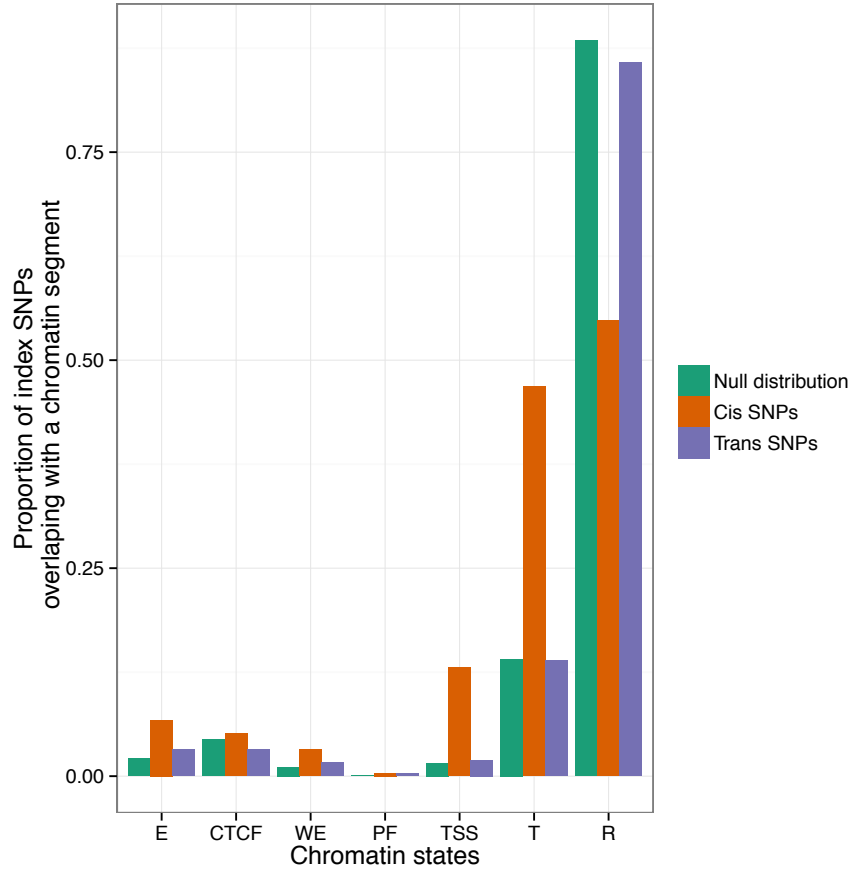

Figure S4: **Location of SNPs relative to genomic features** We used chromatin segmentation<sup>28</sup> as a method for labelling genomic features. All SNPs within 1Mb and  $r^2 > 0.8$  of each *cis*- and *trans*-SNP were taken to find which genomic features ( $x$ -axis) were covered by the SNPs that compose the 501 significant interactions. Green bars represent the proportion ( $y$ -axis) of the 528,509 SNPs used in the analysis that fall within the range of the different genomic features. There is enrichment for *cis*-acting SNPs (red bars) in promoter regions, but *trans*-acting SNPs (blue bars) are not enriched for genomic features. The labels on the  $x$ -axis are as follows: E = Predicted enhancer, CTCF = CTCF enriched element, WE = Predicted weak enhancer or open chromatin cis regulatory element, PF = Predicted promoter flanking region, TSS = Predicted promoter region including transcriptional start site, T = Predicted transcribed region, R = Predicted Repressed or Low Activity region

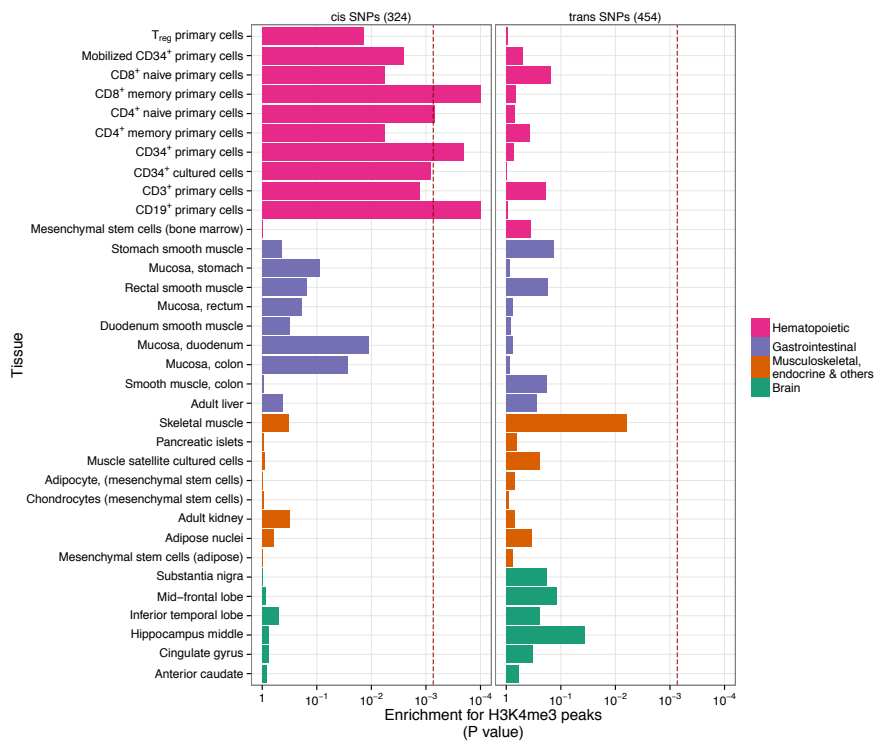

Figure S5: **Tissue specific enrichment of SNPs in transcriptionally active regions** The locations of transcriptional activity can be predicted by chromatin marks, assayed by H3K4me3.<sup>27</sup> Enrichment  $p$ -values are calculated using permutation analysis for 34 different cell types ( $y$ -axis) in four tissue types (Rows of boxes). The dotted red line denotes significance (Bonferroni correction for 34 cell types,  $x$ -axis). There is enrichment for *cis*-acting SNPs in Haematopoietic tissue types only. *Trans*-acting SNPs have no tissue specificity.

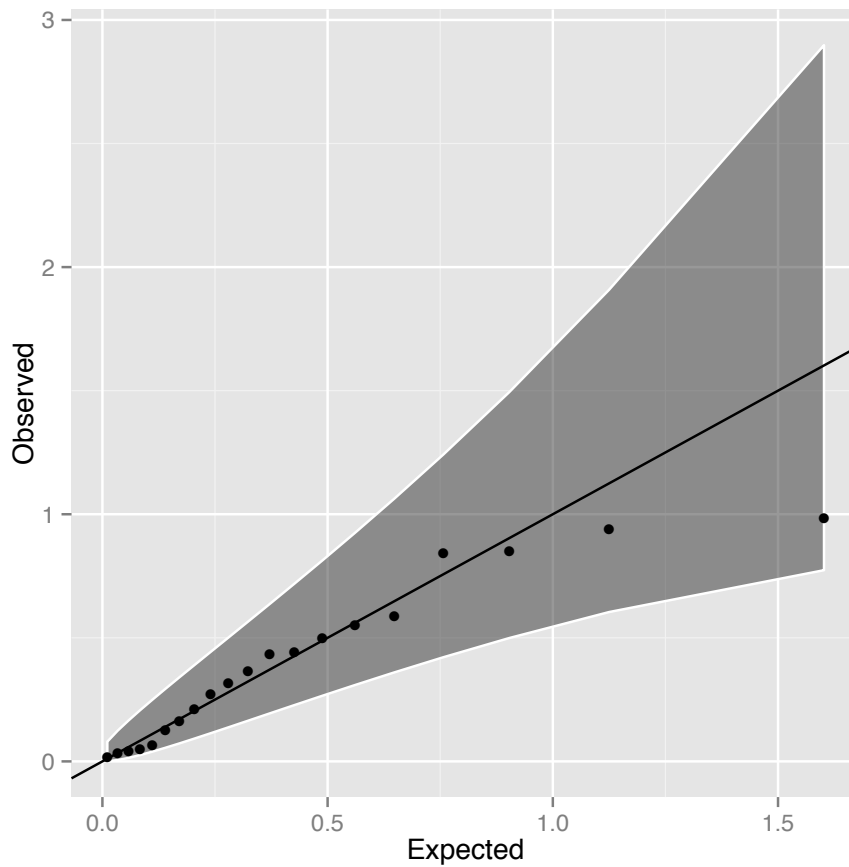

Figure S6: **Q-Q plot of interaction  $p$ -values in the CDHWB dataset**  
Twenty of the 501 discovery SNP pairs passed filtering in the CDHWB dataset (mainly due to small sample size). There is no evidence for enrichment of interaction terms, most likely due to insufficient power given the limited sample size.

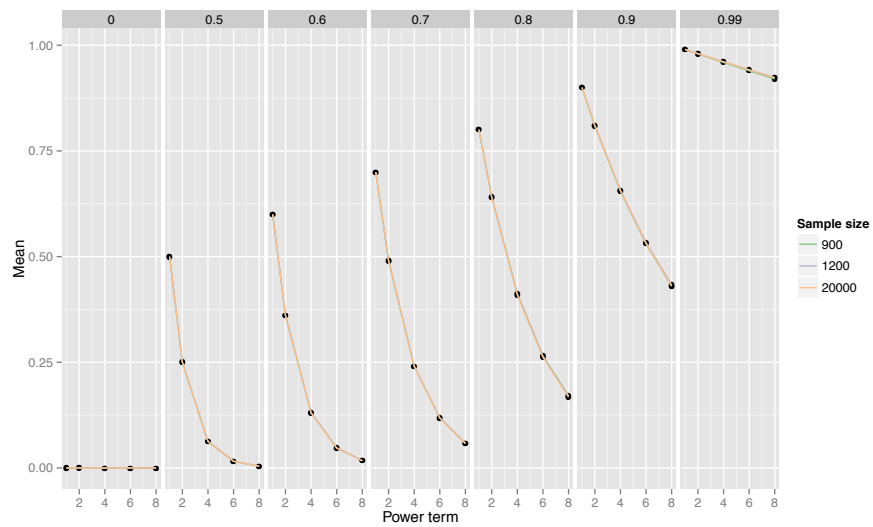

Figure S7: **Sampling mean for different power terms of population  $r$  values** Power of detection and replication of epistatic interactions depends not on  $r^2$  between causal variants and observed SNPs, but on  $r^4, r^6, r^8$ . For a given population value of LD  $r$  (columns of plots), plotted is the sample mean ( $y$ -axis) of  $\hat{r}$ ,  $\hat{r}^2$  (additive),  $\hat{r}^4$  (dominance,  $A \times A$ ),  $\hat{r}^6$  ( $A \times D$ ),  $\hat{r}^8$  ( $D \times D$ ) ( $x$ -axis) for different sample sizes (coloured lines). As true  $r$  reduces the statistical power to detect epistatic variants drops dramatically under the assumption that statistical power is proportional to higher moments of  $r$ .

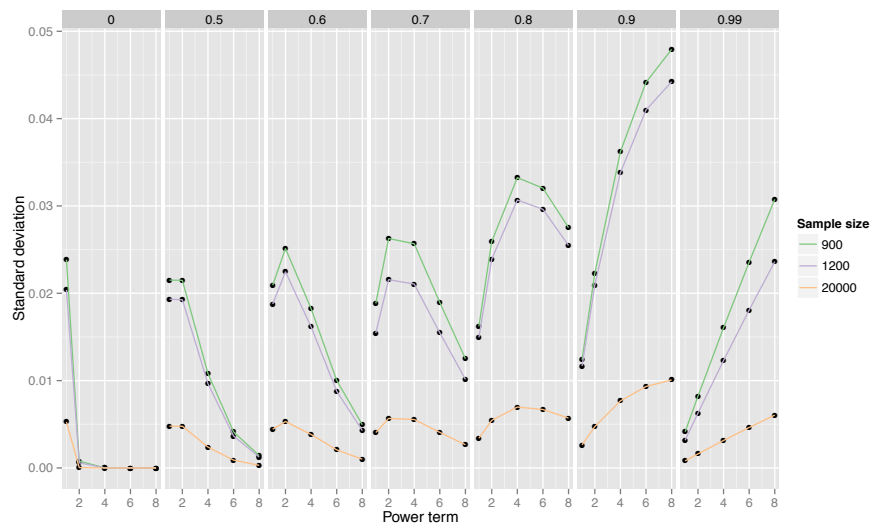

**Figure S8: Sampling standard deviation for different power terms of population  $r$  values** Power of detection and replication of epistatic interactions depends not on  $r^2$  between causal variants and observed SNPs, but on  $r^4, r^6, r^8$ . For a given a population value of LD  $r$  (columns of plots), plotted is the sampling standard deviation ( $y$ -axis) of  $\hat{r}$ ,  $\hat{r}^2$  (additive),  $\hat{r}^4$  (dominance,  $A \times A$ ),  $\hat{r}^6$  ( $A \times D$ ),  $\hat{r}^8$  ( $D \times D$ ) ( $x$ -axis) for different sample sizes (coloured lines). As the power term of  $r$  increases the sampling variance also increases. Supposing that there is sufficiently high  $r^x$  in the discovery sample for detection of epistasis, the replication sample is less likely to have similarly high  $r^x$  as  $x$  increases, leading to an expectation of reduced replication rates.



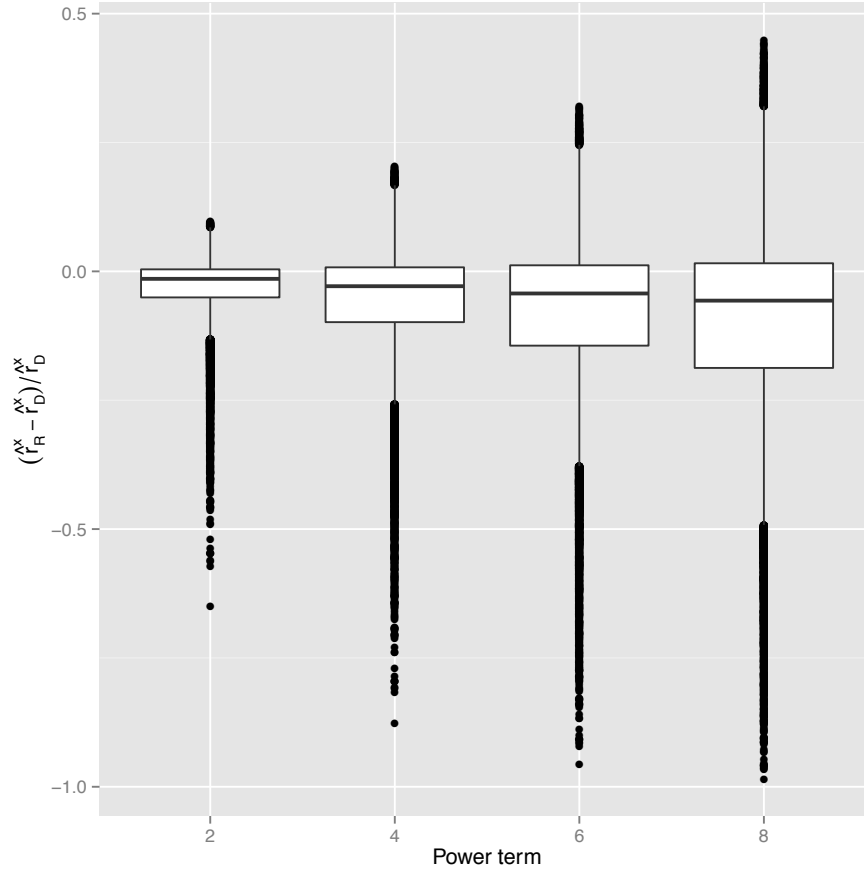

Figure S9: **Reduction in LD as estimated in replication data after ascertaining for high LD in discovery data** 100,000 “unobserved” causal variants (CVs) were tested for LD against a panel of 528,509 “observed” discovery markers (DMs). DM/CV pairs with LD  $r^2 > 0.9$  were then tested in an independent sample. Simulation results of the proportional decrease between discovery and replication datasets in LD ( $y$ -axis) of  $\hat{r}^2, \hat{r}^4, \hat{r}^6, \hat{r}^8$  ( $x$ -axis) are shown, where  $\hat{r}_D^x$  and  $\hat{r}_R^x$  are the sample LD measurements in the discovery and replication datasets, respectively. The average proportional decrease in the replication  $\hat{r}_R^x$  was 2.8%, 5.3%, 7.4% and 9.2% for  $x = 2, 4, 6$  and 8, respectively.

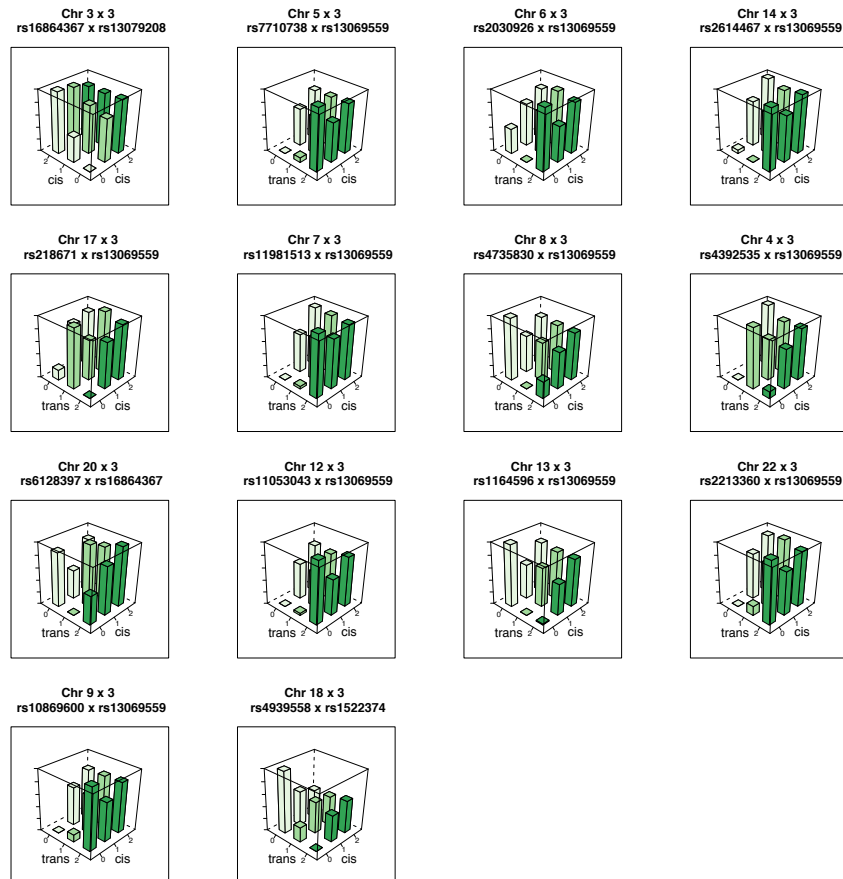

Figure S10: **Genotype-phenotype maps for 14 interactions influencing the expression of MBNL1** Each bar represents the mean phenotypic value for individuals in that genotype class. The rs13069559 SNP typically has a *cis*-additive decreasing effect on the expression of MBNL1, but in many of these interactions the *cis* effect is masked when the *trans* SNP is homozygous for the masking allele.

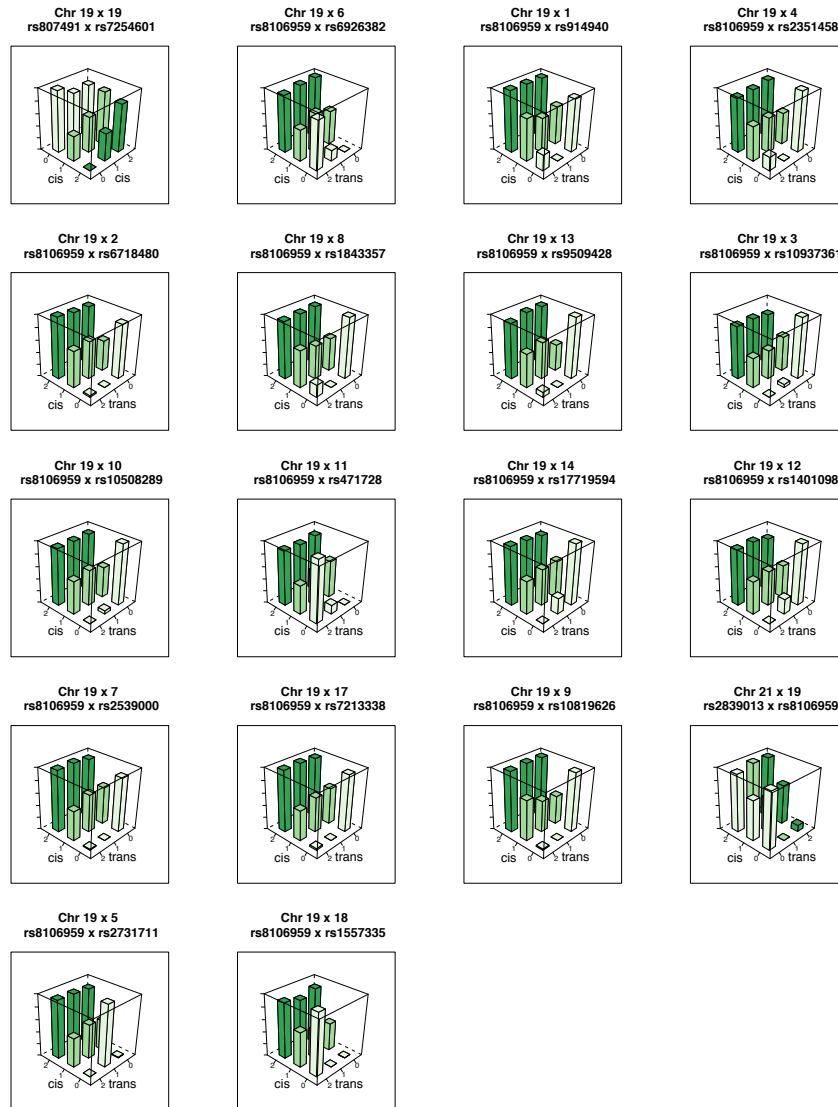

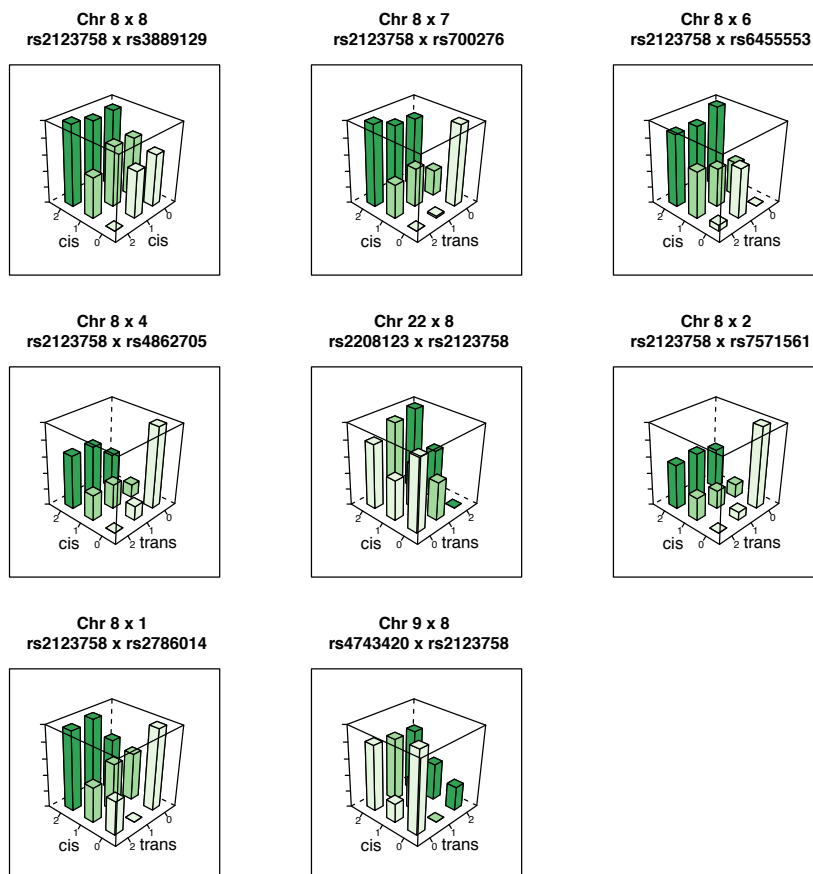

Figure S12: **Genotype-phenotype maps for 8 interactions influencing the expression of NAPRT1** Each bar represents the mean phenotypic value for individuals in that genotype class.

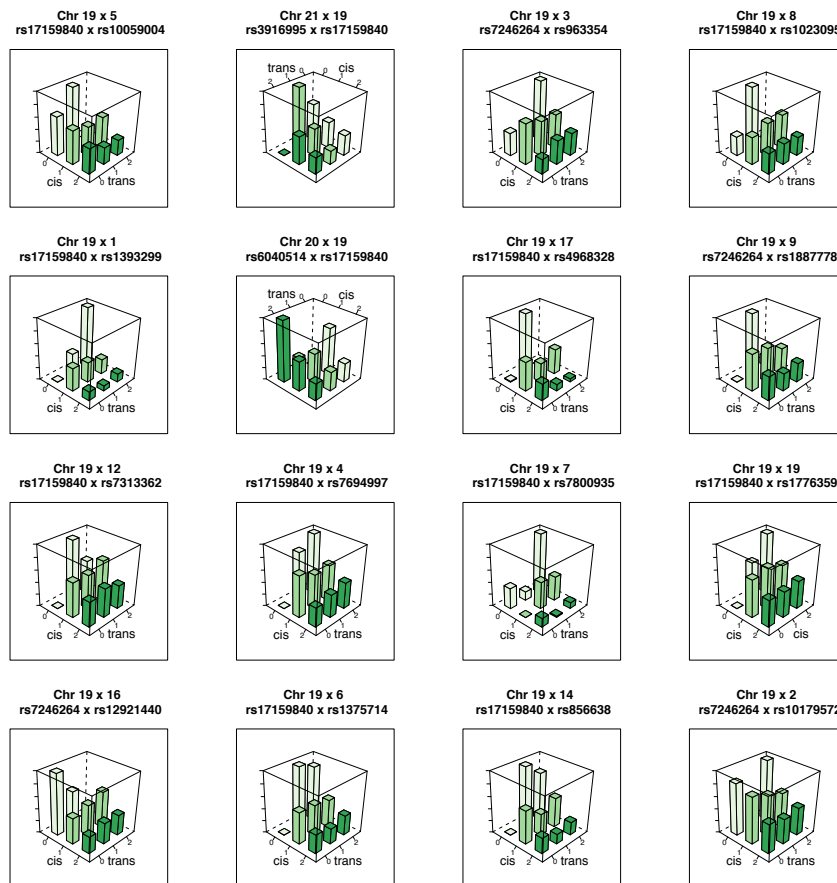

Figure S13: Genotype-phenotype maps for 16 interactions influencing the expression of TRAPPC5. Each bar represents the mean phenotypic value for individuals in that genotype class.

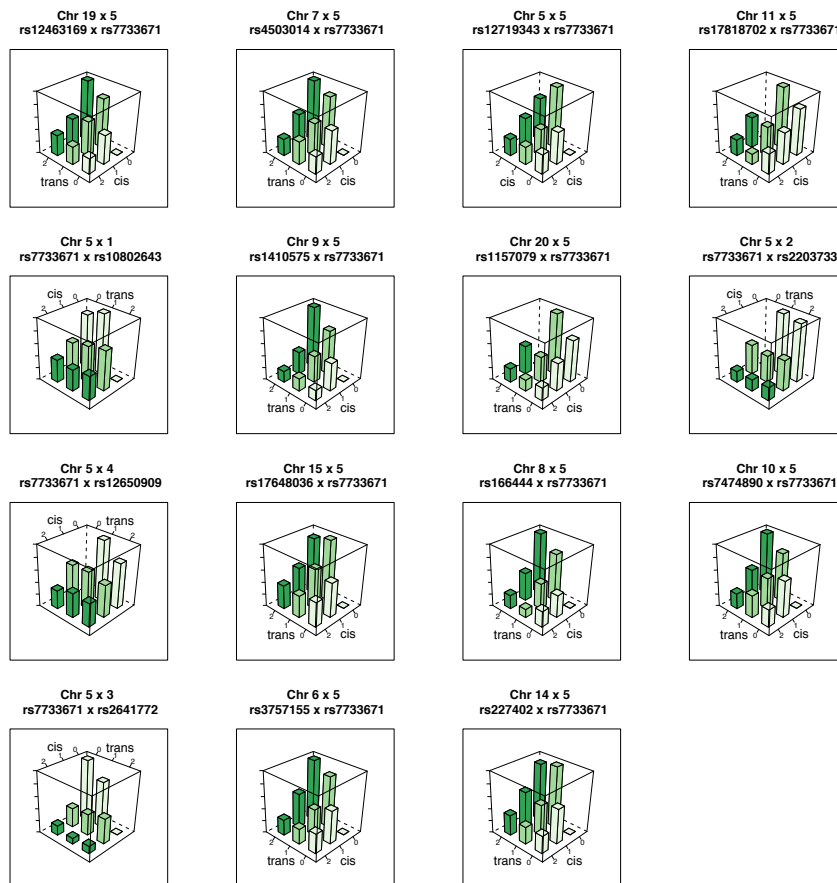

Figure S14: **Genotype-phenotype maps for 15 interactions influencing the expression of CAST** Each bar represents the mean phenotypic value for individuals in that genotype class.

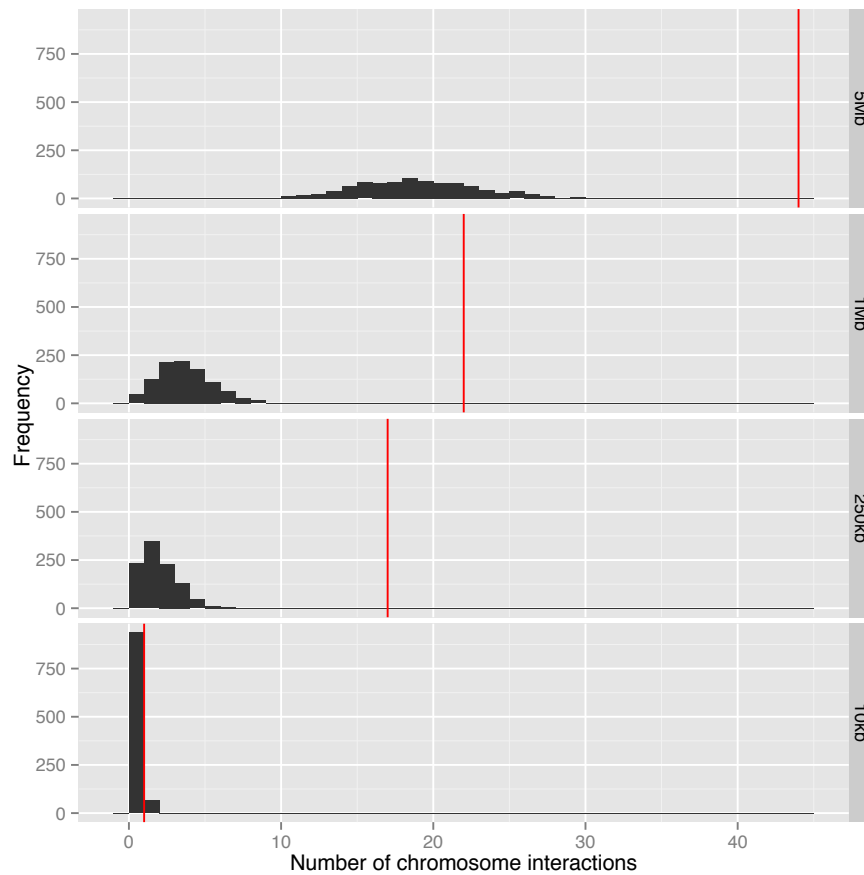

**Figure S15: Number of overlaps between chromosome interactions and epistatic interactions** Interacting chromosome regions may be a possible mechanism underlying epistatic interactions. The number of epistatic interactions within 20kb, 500kb, 2Mb and 10Mb of known chromosome interacting regions are shown by red vertical lines. The histograms represent the null distribution based on random sampling of 1,000 datasets for each window size.

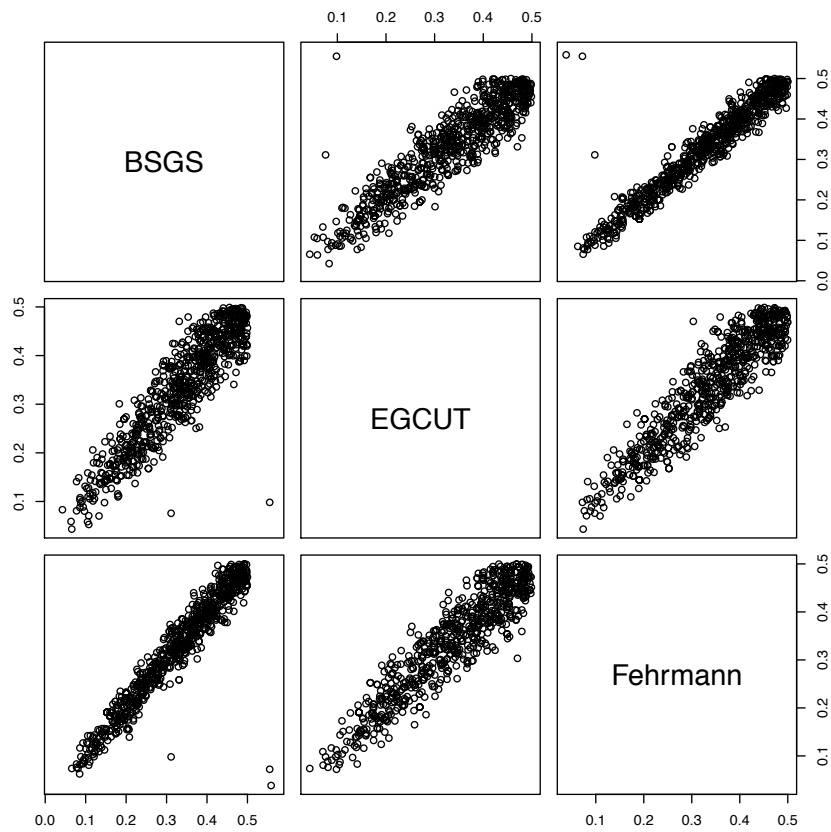

Figure S16: Comparison of allele frequencies for 781 SNPs involved in genetic interactions across independent populations. Outliers were removed from the analysis as part of the filtering stage during replication.



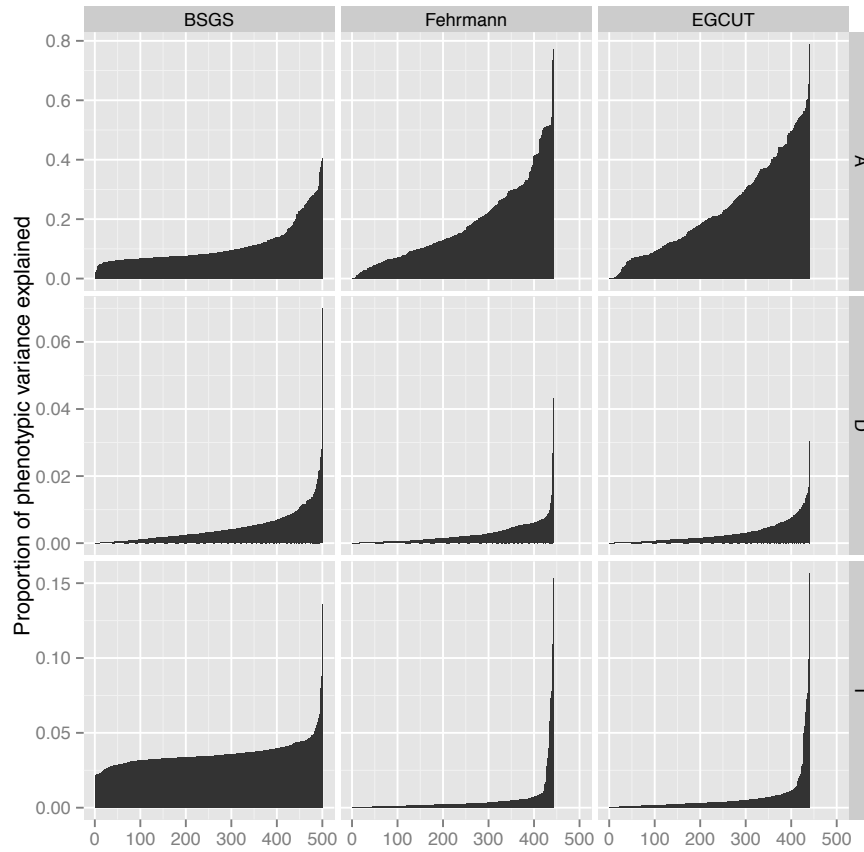

Figure S17: **Comparison of variance explained by additive, dominant and epistatic effects from different cohorts** How does the estimated variance decomposition change in different cohorts? The proportion of the phenotypic variance that is additive (A), dominant (D), or epistatic (I) for each putative interaction is shown on the  $y$ -axis (Note: different scales for each row). BSGS has 501 interactions whereas Fehrmann and EGCUT have 434 ( $x$ -axis). The variance estimates in each plot are ordered from lowest additive to highest. This is done independently for each cohort to depict the distribution of estimated effects.

## Supplementary Tables

Table S1: Details on 501 interactions discovered in BSGS dataset

| Expression trait     |                       |      |            | SNP 1 |                     |                          |            | SNP 2 |                     |                          |                   | Interaction statistic / -log <sub>10</sub> p-values |                    |                   |          | Distance / Mb <sup>†</sup> |  |
|----------------------|-----------------------|------|------------|-------|---------------------|--------------------------|------------|-------|---------------------|--------------------------|-------------------|-----------------------------------------------------|--------------------|-------------------|----------|----------------------------|--|
| Gene ID <sup>a</sup> | Probe ID <sup>b</sup> | Chr. | rs ID      | Chr.  | Pos/Mb <sup>c</sup> | Association <sup>d</sup> | rs ID      | Chr.  | Pos/Mb <sup>c</sup> | Association <sup>d</sup> | BSCS <sup>e</sup> | Fehrmann <sup>f</sup>                               | EGCUT <sup>g</sup> | Meta <sup>g</sup> | Distance | Mb <sup>†</sup>            |  |
| ABCA7                | ILMN_1743205          | 19   | rs375237   | 19    | 1047161             | ABCA7                    | rs596183   | 6     | 138100199           |                          | 5.82              | 0.38 <sup>†</sup>                                   | 0.02 <sup>†</sup>  | 0.09 <sup>†</sup> |          |                            |  |
| ABCA7                | ILMN_1743205          | 19   | rs875237   | 19    | 1047161             | ABCA7                    | rs914737   | 9     | 139522101           |                          | 5.10              | 0.02                                                | 1.81               | 0.95              |          |                            |  |
| ABCA7                | ILMN_1677814          | 17   | rs9435     | 17    | 4877135             | ABCC3                    | rs4732202  | 7     | 136037883           |                          | 6.50              | 0.02                                                | 1.78               | 2.97              |          |                            |  |
| ABCC3                | ILMN_1677814          | 17   | rs9435     | 17    | 4877135             | ABCC3                    | rs1243186  | 14    | 129233691           |                          | 6.59              | 0.34                                                | 0.34               | 0.87              |          |                            |  |
| ADCK1                | ILMN_1698777          | 14   | rs2191806  | 14    | 13688393            | ADCK1                    | rs483941   | 4     | 129233691           |                          | 6.58              | 2.04                                                | 0.83               | 2.05              |          |                            |  |
| ADCK1                | ILMN_1698777          | 14   | rs8058066  | 16    | 88462550            | ADCK1                    | rs1243186  | 14    | 78088813            | ADCK1                    | 6.69              | 18.33                                               | 21.21              | 39.82             | 0.517    |                            |  |
| ADK                  | ILMN_2358626          | 10   | rs2395095  | 10    | 76446305            | ADK                      | rs10824092 | 10    | 75929517            |                          | 6.22              |                                                     |                    |                   |          |                            |  |
| AGAP6                | ILMN_329130           | 10   | rs2611512  | 10    | 51515534            | AGAP6                    | rs2547996  | 5     | 95174319            |                          | 7.15              | 1.83                                                | 1.93               | 2.88              |          |                            |  |
| AHSA2                | ILMN_1798308          | 2    | rs10881585 | 6     | 137112421           | AGAP8                    | rs42647    | 2     | 61119471            |                          | 5.45              | 0.92                                                | 0.64               | 0.94              |          |                            |  |
| AHSA2                | ILMN_1798308          | 2    | rs2523971  | 9     | 29938258            | HLA-G                    | rs1177303  | 2     | 61388355            | AHSA2                    | 5.45              | 0.16                                                | 0.99               | 0.57              |          |                            |  |
| AKT1P                | ILMN_1665982          | 16   | rs2896940  | 16    | 57721127            | AKT1P                    | rs13332406 | 16    | 53489705            | AKT1P                    | 6.91              | 0.71                                                | 0.20               | 0.42              |          |                            |  |
| AKT1P                | ILMN_1665982          | 16   | rs7189819  | 16    | 53536345            | AKT1P                    | rs1362032  | 7     | 125543391           |                          | 6.93              | 0.27                                                | 0.30               | 0.23              |          |                            |  |
| AKT1P                | ILMN_1665982          | 16   | rs7189819  | 16    | 53536345            | AKT1P                    | rs1473017  | 4     | 179323762           |                          | 6.18              | 0.27                                                | 0.30               | 0.23              |          |                            |  |
| ALDH3A2              | ILMN_2401641          | 17   | rs3760489  | 17    | 19581009            | ALDH3A2                  | rs11720112 | 3     | 161996349           |                          | 6.26              | 0.33                                                | 0.37               | 1.01              |          |                            |  |
| ANG                  | ILMN_1760727          | 14   | rs9322855  | 14    | 21153299            | ANG                      | rs4866516  | 5     | 3032625             |                          | 5.75              | 0.02                                                | 0.20               | 0.04              |          |                            |  |
| ANPEP                | ILMN_1763837          | 15   | rs11073891 | 15    | 90363995            | ANPEP                    | rs3823523  | 7     | 154511163           |                          | 5.85              | 0.44                                                | 1.09               | 0.90              |          |                            |  |
| ANPEP                | ILMN_1763837          | 15   | rs11073891 | 15    | 90363995            | ANPEP                    | rs6846031  | 4     | 178019148           |                          | 6.31              | 0.47                                                | 0.17               | 0.26              |          |                            |  |
| AP3B1                | ILMN_1768867          | 5    | rs6453374  | 5     | 77508159            | AP3B1                    | rs4684443  | 3     | 4818792             |                          | 5.94              | 0.05                                                | 0.47               | 0.17              |          |                            |  |
| APPL2                | ILMN_1765076          | 12   | rs935251   | 12    | 105580918           | APPL2                    | rs2769594  | 9     | 87918528            |                          | 5.60              | 0.80                                                | 1.02               | 1.16              |          |                            |  |
| ARL17B               | ILMN_3231962          | 17   | rs12947580 | 17    | 75768225            | ARL17B                   | rs8079215  | 17    | 44064851            | ARL17B                   | 6.65              |                                                     |                    |                   |          |                            |  |
| ARL17B               | ILMN_3231962          | 17   | rs2834541  | 21    | 35932619            | ARL17B                   | rs079215   | 17    | 44064851            | ARL17B                   | 7.64              |                                                     |                    |                   |          |                            |  |
| ARL17B               | ILMN_3231962          | 17   | rs8079215  | 17    | 44064851            | ARL17B                   | rs1960640  | 14    | 94722497            |                          | 6.58              |                                                     |                    |                   |          |                            |  |
| ARL17B               | ILMN_3231962          | 17   | rs8079215  | 17    | 44064851            | ARL17B                   | rs248777   | 15    | 12681212            |                          | 6.58              |                                                     |                    |                   |          |                            |  |
| ARL17B               | ILMN_3231962          | 17   | rs8079215  | 17    | 44064851            | ARL17B                   | rs483941   | 4     | 129233691           |                          | 5.72              |                                                     |                    |                   |          |                            |  |
| ARL17B               | ILMN_3231962          | 17   | rs8079215  | 17    | 44064851            | ARL17B                   | rs8783627  | 3     | 191203546           |                          | 5.84              | 12.18                                               | 3.25               | 14.23             | 0.071    |                            |  |
| ATP13A1              | ILMN_2134224          | 19   | rs4284750  | 19    | 19810050            | ATP13A1                  | rs8783627  | 3     | 191203546           |                          | 5.30              |                                                     |                    |                   |          |                            |  |
| BID                  | ILMN_1763836          | 22   | rs8919     | 22    | 18213057            | BID                      | rs8783627  | 3     | 191203546           |                          | 5.84              | 0.06                                                | 0.40               | 0.14              |          |                            |  |
| BID                  | ILMN_1763836          | 22   | rs181405   | 22    | 18233000            | BID                      | rs9804943  | 12    | 129906275           |                          | 6.60              | 0.87                                                | 0.16               | 0.50              |          |                            |  |
| BID                  | ILMN_1752988          | 11   | rs2568061  | 11    | 8886260             | BID                      | rs10888267 | 4     | 189150656           |                          | 5.66              | 1.15                                                | 0.04               | 0.54              |          |                            |  |
| C13ORF18             | ILMN_2196550          | 13   | rs2110603  | 13    | 6259852             | C13ORF18                 | rs6553184  | 4     | 189150656           |                          | 5.66              | 0.28                                                | 0.28               | 0.22              |          |                            |  |
| C13ORF18             | ILMN_2196550          | 13   | rs674754   | 13    | 46913416            | C13ORF18                 | rs674754   | 13    | 46913416            | C13ORF18                 | 6.66              | 0.28                                                | 0.28               | 0.22              |          |                            |  |
| C13ORF18             | ILMN_2196550          | 13   | rs674754   | 13    | 46913416            | C13ORF18                 | rs6857876  | 4     | 153610164           |                          | 3.87              | 0.38                                                | 0.50               | 0.43              |          |                            |  |
| C14ORF173            | ILMN_2398450          | 14   | rs11089825 | 22    | 37575398            | C14ORF173                | rs4983382  | 14    | 105189504           | C14ORF173                | 6.02              | 0.60                                                | 0.84               | 0.85              |          |                            |  |
| C14ORF173            | ILMN_2398450          | 14   | rs3935344  | 15    | 92276674            | C14ORF173                | rs4983382  | 14    | 105189504           | C14ORF173                | 5.98              | 0.31                                                | 0.28               | 0.24              |          |                            |  |
| C14ORF173            | ILMN_2398450          | 14   | rs4983382  | 14    | 105189504           | C14ORF173                | rs10754644 | 1     | 238724741           |                          | 7.15              | 0.42                                                | 0.34               | 0.35              |          |                            |  |
| C14ORF4              | ILMN_1804396          | 14   | rs1293455  | 18    | 13819673            | C14ORF4                  | rs2655991  | 14    | 77574438            |                          | 4.87              |                                                     |                    |                   |          |                            |  |
| C14ORF4              | ILMN_1804396          | 14   | rs2655991  | 14    | 77574438            | C14ORF4                  | rs10972462 | 9     | 35427324            |                          | 4.40              |                                                     |                    |                   |          |                            |  |
| C14ORF4              | ILMN_1804396          | 14   | rs2655991  | 14    | 77574438            | C14ORF4                  | rs6445340  | 3     | 63371601            |                          | 4.05              |                                                     |                    |                   |          |                            |  |
| C14ORF4              | ILMN_1804396          | 14   | rs6793445  | 17    | 70416307            | C14ORF4                  | rs9787151  | 14    | 63179138            |                          | 4.61              |                                                     |                    |                   |          |                            |  |
| C14ORF4              | ILMN_1804396          | 14   | rs6793445  | 17    | 70416307            | C14ORF4                  | rs2655991  | 14    | 77574438            |                          | 4.61              |                                                     |                    |                   |          |                            |  |
| C14ORF4              | ILMN_1804396          | 14   | rs6010061  | 22    | 51151724            | C14ORF4                  | rs2655991  | 14    | 77574438            |                          | 4.61              |                                                     |                    |                   |          |                            |  |
| C14ORF4              | ILMN_1804396          | 14   | rs7245800  | 19    | 32083552            | C14ORF4                  | rs2655991  | 14    | 77574438            |                          | 4.61              |                                                     |                    |                   |          |                            |  |
| C14ORF4              | ILMN_1804396          | 14   | rs7245800  | 19    | 32083552            | C14ORF4                  | rs2460002  | 14    | 77574438            |                          | 4.61              |                                                     |                    |                   |          |                            |  |
| C14ORF60             | ILMN_172899           | 17   | rs2334182  | 16    | 10577957            | C14ORF60                 | rs2460002  | 14    | 77574438            |                          | 4.61              |                                                     |                    |                   |          |                            |  |
| C14ORF60             | ILMN_172899           | 17   | rs2334182  | 16    | 10577957            | C14ORF60                 | rs2460002  | 14    | 77574438            |                          | 4.61              |                                                     |                    |                   |          |                            |  |
| C14ORF60             | ILMN_172899           | 17   | rs2334182  | 16    | 10577957            | C14ORF60                 | rs2460002  | 14    | 77574438            |                          | 4.61              |                                                     |                    |                   |          |                            |  |
| C14ORF60             | ILMN_172899           | 17   | rs2334182  | 16    | 10577957            | C14ORF60                 | rs2460002  | 14    | 77574438            |                          | 4.61              |                                                     |                    |                   |          |                            |  |
| C14ORF60             | ILMN_172899           | 17   | rs2334182  | 16    | 10577957            | C14ORF60                 | rs2460002  | 14    | 77574438            |                          | 4.61              |                                                     |                    |                   |          |                            |  |
| C14ORF60             | ILMN_172899           | 17   | rs2334182  | 16    | 10577957            | C14ORF60                 | rs2460002  | 14    | 77574438            |                          | 4.61              |                                                     |                    |                   |          |                            |  |
| C14ORF60             | ILMN_172899           | 17   | rs2334182  | 16    | 10577957            | C14ORF60                 | rs2460002  | 14    | 77574438            |                          | 4.61              |                                                     |                    |                   |          |                            |  |
| C14ORF60             | ILMN_172899           | 17   | rs2334182  | 16    | 10577957            | C14ORF60                 | rs2460002  | 14    | 77574438            |                          | 4.61              |                                                     |                    |                   |          |                            |  |
| C14ORF60             | ILMN_172899           | 17   | rs2334182  | 16    | 10577957            | C14ORF60                 | rs2460002  | 14    | 77574438            |                          | 4.61              |                                                     |                    |                   |          |                            |  |
| C14ORF60             | ILMN_172899           | 17   | rs2334182  | 16    | 10577957            | C14ORF60                 | rs2460002  | 14    | 77574438            |                          | 4.61              |                                                     |                    |                   |          |                            |  |
| C14ORF60             | ILMN_172899           | 17   | rs2334182  | 16    | 10577957            | C14ORF60                 | rs2460002  | 14    | 77574438            |                          | 4.61              |                                                     |                    |                   |          |                            |  |
| C14ORF60             | ILMN_172899           | 17   | rs2334182  | 16    | 10577957            | C14ORF60                 | rs2460002  | 14    | 77574438            |                          | 4.61              |                                                     |                    |                   |          |                            |  |
| C14ORF60             | ILMN_172899           | 17   | rs2334182  | 16    | 10577957            | C14ORF60                 | rs2460002  | 14    | 77574438            |                          | 4.61              |                                                     |                    |                   |          |                            |  |
| C14ORF60             | ILMN_172899           | 17   | rs2334182  | 16    | 10577957            | C14ORF60                 | rs2460002  | 14    | 77574438            |                          | 4.61              |                                                     |                    |                   |          |                            |  |
| C14ORF60             | ILMN_172899           | 17   | rs2334182  | 16    | 10577957            | C14ORF60                 | rs2460002  | 14    | 77574438            |                          | 4.61              |                                                     |                    |                   |          |                            |  |
| C14ORF60             | ILMN_172899           | 17   | rs2334182  | 16    | 10577957            | C14ORF60                 | rs2460002  | 14    | 77574438            |                          | 4.61              |                                                     |                    |                   |          |                            |  |
| C14ORF60             | ILMN_172899           | 17   | rs2334182  | 16    | 10577957            | C14ORF60                 | rs2460002  | 14    | 77574438            |                          | 4.61              |                                                     |                    |                   |          |                            |  |
| C14ORF60             | ILMN_172899           | 17   | rs2334182  | 16    | 10577957            | C14ORF60                 | rs2460002  | 14    | 77574438            |                          | 4.61              |                                                     |                    |                   |          |                            |  |
| C14ORF60             | ILMN_172899           | 17   | rs2334182  | 16    | 10577957            | C14ORF60                 | rs2460002  | 14    | 77574438            |                          | 4.61              |                                                     |                    |                   |          |                            |  |
| C14ORF60             | ILMN_172899           | 17   | rs2334182  | 16    | 10577957            | C14ORF60                 | rs2460002  | 14    | 77574438            |                          | 4.61              |                                                     |                    |                   |          |                            |  |
| C14ORF60             | ILMN_172899           | 17   | rs2334182  | 16    | 10577957            | C14ORF60                 | rs2460002  | 14    | 77574438            |                          | 4.61              |                                                     |                    |                   |          |                            |  |
| C14ORF60             | ILMN_172899           | 17   | rs2334182  | 16    | 10577957            | C14ORF60                 | rs2460002  | 14    | 77574438            |                          | 4.61              |                                                     |                    |                   |          |                            |  |
| C14ORF60             | ILMN_172899           | 17   | rs2334182  | 16    | 10577957            | C14ORF60                 | rs2460002  | 14    | 77574438            |                          | 4.61              |                                                     |                    |                   |          |                            |  |
| C14ORF60             | ILMN_172899           | 17   | rs2334182  | 16    | 10577957            | C14ORF60                 | rs2460002  | 14    | 77574438            |                          | 4.61              |                                                     |                    |                   |          |                            |  |
| C14ORF60             | ILMN_172899           | 17   | rs2334182  | 16    | 10577957            | C14ORF60                 | rs2460002  | 14    | 77574438            |                          | 4.61              |                                                     |                    |                   |          |                            |  |
| C14ORF60             | ILMN_172899           | 17   | rs2334182  | 16    | 10577957            | C14ORF60                 | rs2460002  | 14    | 77574438            |                          | 4.61              |                                                     |                    |                   |          |                            |  |
| C14ORF60             | ILMN_172899           | 17   | rs2334182  | 16    | 10577957            | C14ORF60                 | rs2460002  | 14    | 77574438            |                          | 4.61              |                                                     |                    |                   |          |                            |  |
| C14ORF60             | ILMN_1728             |      |            |       |                     |                          |            |       |                     |                          |                   |                                                     |                    |                   |          |                            |  |



Table S1 – continued from previous page

| Expression trait     |                       | SNP 1 |            | SNP 2 |                      | Association <sup>d</sup> |            | Association <sup>d</sup> |                      | Interaction statistic / = log <sub>10</sub> p-values |                  | Distance / Mpb        |                    |        |
|----------------------|-----------------------|-------|------------|-------|----------------------|--------------------------|------------|--------------------------|----------------------|------------------------------------------------------|------------------|-----------------------|--------------------|--------|
| Gene ID <sup>a</sup> | Probe ID <sup>b</sup> | Chr.  | rs ID      | Chr.  | Pos./Mb <sup>c</sup> | Association <sup>d</sup> | rs ID      | Chr.                     | Pos./Mb <sup>c</sup> | Association <sup>d</sup>                             | BGS <sup>e</sup> | Fehrmann <sup>f</sup> | EGCUT <sup>g</sup> | MetaK  |
| CPVL                 | ILMIN_1682928         | 7     | rs2835998  | 21    | 392025070            |                          | rs245884   | 7                        | 29188475             | CPVL                                                 | 5.55             | 0.19                  | 0.03               | 0.04   |
| CRIP1                | ILMIN_1813256         | 2     | rs2131290  | 4     | 188859080            |                          | rs1531133  | 7                        | 46843631             | CRIP1                                                | 5.47             | 0.28                  | 0.10               | 0.12   |
| CRIS1                | ILMIN_1737685         | 20    | rs6139887  | 20    | 5986234              | CRL51                    | rs1473927  | 5                        | 62406048             |                                                      | 6.18             | 0.10                  | 0.36               | 0.15   |
| CSTB                 | ILMIN_1761797         | 21    | rs6979356  | 21    | 45230974             |                          | rs3761385  | 21                       | 45230974             |                                                      | 11.99            | 23.20                 | 16.72              | 42.27  |
| CTNNA1               | ILMIN_1604854         | 18    | rs924943   | 18    | 69500505             |                          | rs176382   | 5                        | 138226707            | CTNNA1                                               | 5.74             | 0.02                  | 0.41               | 0.11   |
| CTSC                 | ILMIN_1696347         | 11    | rs2457684  | 11    | 86139983             | CTSC                     | rs7079264  | 10                       | 108679892            |                                                      | 5.67             | 0.92                  | 0.74               | 1.03   |
| CTSC                 | ILMIN_229247          | 22    | rs1703295  | 22    | 83176925             |                          | rs155892   | 11                       | 8807370              | CTSC                                                 | 7.14             | 1.54                  | 15.66              | 33.52  |
| CWF19L1              | ILMIN_1651886         | 10    | rs7108734  | 11    | 11456927             |                          | rs12784306 | 10                       | 102027407            | CWF19L1                                              | 5.42             | 0.21                  | 0.01               | 0.03   |
| CYBRD1               | ILMIN_1712305         | 2     | rs2592948  | 4     | 120994690            |                          | rs888427   | 2                        | 172368120            | CYBRD1                                               | 5.89             | 0.23                  | 0.53               | 0.34   |
| CYBRD1               | ILMIN_1712305         | 2     | rs7852475  | 9     | 140698856            |                          | rs888427   | 2                        | 172368120            | CYBRD1                                               | 5.68             | 0.20                  | 0.02               | 0.04   |
| CYBRD1               | ILMIN_2087692         | 2     | rs11257679 | 10    | 12318284             |                          | rs888427   | 2                        | 172368120            | CYBRD1                                               | 5.81             | 0.39                  | 1.87               | 1.47   |
| CYBRD1               | ILMIN_2087692         | 2     | rs6137908  | 20    | 23344590             |                          | rs888427   | 2                        | 172368120            | CYBRD1                                               | 5.63             | 0.05                  | 0.83               | 0.36   |
| CYBRD1               | ILMIN_2087692         | 2     | rs888427   | 2     | 172368120            | CYBRD1                   | rs7591849  | 2                        | 160112881            |                                                      | 5.85             | 0.87                  | 0.10               | 0.44   |
| CYP27A1              | ILMIN_1704985         | 2     | rs6021982  | 20    | 36571928             |                          | rs933994   | 2                        | 219650616            | CYP27A1                                              | 5.42             | 0.29                  | 0.86               | 0.60   |
| DAB2                 | ILMIN_2128428         | 5     | rs778910   | 7     | 110451383            |                          | rs1343244  | 6                        | 39381357             | DAB2                                                 | 9.12             | 0.00                  | 0.48               | 0.41   |
| DCAKD                | ILMIN_1811648         | 17    | rs9900173  | 17    | 43111688             |                          | rs2378341  | 6                        | 82076988             |                                                      | 9.44             | 0.00                  | 0.58               | 0.14   |
| DDT                  | ILMIN_1690982         | 22    | rs5760102  | 22    | 24248761             | DDT                      | rs7042042  | 3                        | 187475208            |                                                      | 5.62             | 0.64                  | 0.25               | 0.42   |
| DDX58                | ILMIN_1797001         | 9     | rs4937097  | 11    | 125962645            |                          | rs2519515  | 9                        | 32451144             |                                                      | 5.31             | 0.61                  | 0.29               | 0.44   |
| DEMI                 | ILMIN_1783996         | 1     | rs10120023 | 9     | 137810259            | COQ10A                   | rs10120023 | 9                        | 137810259            | COQ10A                                               | 5.47             | 0.08                  | 0.41               | 0.16   |
| DEMI                 | ILMIN_1783996         | 1     | rs12363827 | 11    | 106703727            |                          | rs7566044  | 2                        | 169960422            |                                                      | 6.39             | 0.77                  | 0.02               | 0.29   |
| DHRS9                | ILMIN_1733998         | 2     | rs1519956  | 12    | 8468283              |                          | rs7566044  | 2                        | 169960422            | DHRS9                                                | 6.00             | 0.06                  | 1.17               | 0.58   |
| DHRS9                | ILMIN_1733998         | 2     | rs1528529  | 7     | 147132505            |                          | rs2161037  | 2                        | 169893419            | DHRS9                                                | 6.48             | 0.37                  | 0.34               | 0.32   |
| DHRS9                | ILMIN_2384181         | 2     | rs2831914  | 21    | 29959453             |                          | rs2161037  | 2                        | 169893419            | DHRS9                                                | 5.51             | 0.88                  | 0.04               | 0.37   |
| DHRS9                | ILMIN_2384181         | 2     | rs7661304  | 17    | 187776431            |                          | rs8729082  | 12                       | 169893419            | DHRS9                                                | 7.64             | 0.05                  | 0.11               | 0.03   |
| DIP2B                | ILMIN_1755589         | 12    | rs1106935  | 17    | 50636364             | LASS5                    | rs7134595  | 7                        | 153130888            | LASS5                                                | 4.97             | 0.32                  | 0.58               | 0.10   |
| DIP2B                | ILMIN_1755589         | 12    | rs4358585  | 19    | 41711815             |                          | rs1808634  | 12                       | 507330488            | LASS5                                                | 5.31             | 0.30                  | 0.22               | 0.19   |
| DIP2B                | ILMIN_1755589         | 12    | rs7134595  | 12    | 50730458             | LASS5                    | rs1808634  | 12                       | 507330488            | LASS5                                                | 4.40             | 0.30                  | 0.37               | 0.22   |
| DIP2B                | ILMIN_1755589         | 12    | rs7312252  | 12    | 50744171             | LASS5                    | rs4532958  | 10                       | 115214154            |                                                      | 5.03             | 0.09                  | 0.02               | 0.01   |
| DIP2B                | ILMIN_1755589         | 12    | rs871257   | 12    | 117994348            |                          | rs12427978 | 12                       | 51071199             | LASS5                                                | 5.92             | 0.48                  | 0.00               | 0.11   |
| DIP2B                | ILMIN_1755589         | 12    | rs2286842  | 7     | 157216093            |                          | rs3779589  | 7                        | 157163614            | DNAJB6                                               | 5.79             | 0.23                  | 1.45               | 0.97   |
| DNAJB6               | ILMIN_2349610         | 3     | rs12232308 | 15    | 93409054             |                          | rs16320360 | 3                        | 16320360             | DNAJB6                                               | 6.17             | 1.58                  | 0.27               | 1.12   |
| ECGF1                | ILMIN_2109708         | 22    | rs4234091  | 22    | 50971266             | ECGF1                    | rs4891884  | 18                       | 64004670             | DPH3                                                 | 4.81             | 1.51                  | 1.18               | 0.70   |
| ECHDC2               | ILMIN_1671568         | 1     | rs4234091  | 2     | 241911027            |                          | rs11206043 | 1                        | 53402552             | ECHDC2                                               | 6.19             | 0.22                  | 0.35               | 0.22   |
| ECHDC2               | ILMIN_1671568         | 1     | rs5992637  | 22    | 17675900             |                          | rs11206043 | 1                        | 53402552             | ECHDC2                                               | 5.58             | 0.42                  | 0.16               | 0.35   |
| EHD4                 | ILMIN_1720083         | 15    | rs10403312 | 19    | 53244938             |                          | rs1048166  | 15                       | 42192040             | EHD4                                                 | 6.98             | 0.90                  | 0.47               | 0.79   |
| EIF2B2               | ILMIN_1713380         | 14    | rs6567288  | 18    | 60218834             |                          | rs175450   | 14                       | 75590340             | EIF2B2                                               | 5.56             | 0.23                  | 0.11               | 0.10   |
| EIF5A                | ILMIN_1794522         | 17    | rs7216490  | 17    | 7221707              | EIF5A                    | rs1269096  | 14                       | 99603119             |                                                      | 5.44             | 0.56                  | 0.08               | 0.24   |
| EIF5A                | ILMIN_1794522         | 17    | rs7216490  | 17    | 7221707              | EIF5A                    | rs1553474  | 2                        | 49359676             |                                                      | 5.55             | 0.28                  | 0.59               | 0.41   |
| EIF5A                | ILMIN_1794522         | 17    | rs7216490  | 17    | 7221707              | EIF5A                    | rs2197210  | 8                        | 129624067            |                                                      | 6.36             | 0.08                  | 0.05               | 0.02   |
| EIF5A                | ILMIN_1794522         | 17    | rs7216490  | 17    | 7221707              | EIF5A                    | rs4471434  | 11                       | 126387391            |                                                      | 5.51             | 0.36                  | 0.04               | 0.11   |
| EMR2                 | ILMIN_2353633         | 19    | rs2196249  | 21    | 23196249             |                          | rs9305048  | 19                       | 14879034             | EMR2                                                 | 6.52             | 0.05                  | 1.12               | 0.53   |
| EMR2                 | ILMIN_2353633         | 19    | rs6132112  | 20    | 1876114              |                          | rs3059048  | 19                       | 14879034             | EMR2                                                 | 3.56             | 0.36                  | 0.40               | 0.41   |
| EMR2                 | ILMIN_2353633         | 19    | rs9305048  | 19    | 14879034             |                          | rs14606604 | 13                       | 271460604            | EMR2                                                 | 5.20             | 0.20                  | 0.58               | 0.35   |
| EPHX2                | ILMIN_1792927         | 8     | rs107764   | 11    | 12709096             |                          | rs12115088 | 8                        | 578742               | EPHX2                                                | 5.43             | 0.25                  | 1.20               | 0.81   |
| EPHX2                | ILMIN_1731001         | 8     | rs10894861 | 11    | 13461176             |                          | rs4735900  | 8                        | 607161               | EPHX2                                                | 5.09             | 0.20                  | 0.11               | 0.09   |
| ERICH1               | ILMIN_1731001         | 8     | rs5766218  | 22    | 43337329             |                          | rs12115088 | 8                        | 578742               | ERICH1                                               | 6.11             | 0.20                  | 0.11               | 0.08   |
| ERICH1               | ILMIN_1731001         | 8     | rs726145   | 18    | 31387910             |                          | rs12115088 | 8                        | 578742               | ERICH1                                               | 5.65             | 0.29                  | 0.04               | 0.08   |
| ERICH1               | ILMIN_1731001         | 8     | rs726145   | 18    | 31387910             |                          | rs1517297  | 4                        | 182786760            | ERICH1                                               | 6.63             | 0.67                  | 1.03               | 0.44   |
| ERICH1               | ILMIN_2104696         | 5     | rs4735895  | 10    | 600729               |                          | rs12188164 | 5                        | 428286               | EXOC3                                                | 6.83             | 0.74                  | 0.19               | 0.44   |
| EXOC3                | ILMIN_1789419         | 8     | rs187076   | 8     | 55228462             |                          | rs344363   | 16                       | 1972548              | FAHD1                                                | 5.61             | 0.27                  | 1.38               | 10.736 |
| EXOC3                | ILMIN_2246661         | 16    | rs1560104  | 16    | 12708208             |                          | rs10120023 | 9                        | 137810259            | COQ10A                                               | 6.33             | 0.27                  | 0.30               | 0.23   |
| FCN1                 | ILMIN_1668063         | 9     | rs12580388 | 12    | 129591144            |                          |            |                          |                      |                                                      |                  |                       |                    |        |

Continued on next page

Table S1 – continued from previous page

| Gene ID <sup>a</sup> | Expression trait      |      | SNP 1      |      | SNP 2     |      | Association <sup>d</sup> |                       | rs ID       | Chr. | Pos/Mb <sup>c</sup> | Association <sup>d</sup> | Interaction statistic / = log <sub>10</sub> p-values |       | Distance / Mb <sup>b</sup> |       |
|----------------------|-----------------------|------|------------|------|-----------|------|--------------------------|-----------------------|-------------|------|---------------------|--------------------------|------------------------------------------------------|-------|----------------------------|-------|
|                      | Probe ID <sup>b</sup> | Chr. | rs ID      | Chr. | rs ID     | Chr. | BSCSe <sup>e</sup>       | Fehrmann <sup>f</sup> |             |      |                     |                          | EGCUT <sup>g</sup>                                   | MetaK |                            |       |
| FEZ2                 | ILMN-1739586          | 2    | rs2356400  | 19   | 44321376  | 19   | 44321376                 | FLJ20489              | rs13406184  | 2    | 36791226            | FEZ2                     | 5.78                                                 | 0.14  | 0.33                       | 0.16  |
| FEZ2                 | ILMN-1739586          | 2    | rs69010    | 4    | 159963132 | 4    | 159963132                |                       | rs116916000 | 2    | 36810133            | FEZ2                     | 6.59                                                 | 0.14  | 0.28                       | 0.14  |
| FGD2                 | ILMN-2115005          | 6    | rs4803848  | 19   | 46205050  | 19   | 46205050                 |                       | rs831486    | 6    | 37001267            | FGD2                     | 5.69                                                 | 0.12  | 0.25                       | 0.11  |
| FGD2                 | ILMN-2115005          | 6    | rs902634   | 10   | 36393951  | 10   | 36393951                 |                       | rs831489    | 6    | 36999682            | FGD2                     | 5.49                                                 | 1.20  | 0.11                       | 0.66  |
| FLJ20489             | ILMN-1778144          | 12   | rs17615703 | 12   | 117036766 | 12   | 117036766                | FLJ20489              | rs3782908   | 12   | 48169526            | FLJ20489                 | 5.81                                                 | 0.00  | 0.70                       | 0.29  |
| FLJ20489             | ILMN-1778144          | 12   | rs3782908  | 12   | 48169526  | 12   | 48169526                 |                       | rs975311    | 4    | 167695661           | FLJ20489                 | 5.53                                                 | 0.03  | 0.11                       | 0.02  |
| FLJ20489             | ILMN-1778144          | 12   | rs4932410  | 12   | 97831328  | 12   | 97831328                 |                       | rs3782908   | 12   | 48169526            | FLJ20489                 | 5.42                                                 | 0.03  | 0.14                       | 0.04  |
| FLJ20489             | ILMN-1778144          | 12   | rs7204135  | 15   | 97831328  | 15   | 97831328                 |                       | rs3782908   | 12   | 48169526            | FLJ20489                 | 6.49                                                 | 0.31  | 0.17                       | 0.36  |
| FLJ20489             | ILMN-1778144          | 12   | rs9325634  | 16   | 50626195  | 16   | 50626195                 |                       | rs2287197   | 16   | 50106594            | FLJ20718                 | 6.90                                                 | 0.38  | 0.17                       | 0.21  |
| FLJ43093             | ILMN-2128450          | 6    | rs17112712 | 14   | 107276627 | 14   | 107276627                | FLJ43093              | rs6906101   | 6    | 36667610            | FLJ43093                 | 6.04                                                 | 0.14  | 0.06                       | 0.13  |
| FLJ43093             | ILMN-2128450          | 6    | rs6906101  | 6    | 36667610  | 6    | 36667610                 |                       | rs13214069  | 6    | 32705248            | FLJ43093                 | 5.48                                                 | 0.39  | 0.05                       | 0.18  |
| FN3KRP               | ILMN-1652333          | 17   | rs898095   | 17   | 80890638  | 17   | 80890638                 |                       | rs8982064   | 17   | 80827903            | FUCA1                    | 16.16                                                | 28.24 | 29.39                      | 59.95 |
| FUCA1                | ILMN-1752728          | 1    | rs4971478  | 2    | 1346063   | 2    | 1346063                  |                       | rs12744386  | 1    | 24168019            | FUCA1                    | 6.41                                                 | 0.01  | 0.30                       | 0.06  |
| FXYD5                | ILMN-2309848          | 19   | rs1633921  | 19   | 35695200  | 19   | 35695200                 | FXYD5                 | rs788178    | 13   | 98328559            | FXYD5                    | 3.70                                                 | 0.09  | 0.41                       | 0.17  |
| FXYD5                | ILMN-2309848          | 19   | rs17398183 | 20   | 55609148  | 20   | 55609148                 |                       | rs2285515   | 19   | 35660450            | FXYD5                    | 6.58                                                 | 0.03  | 0.48                       | 0.15  |
| FXYD5                | ILMN-2309848          | 19   | rs2285515  | 19   | 35660450  | 19   | 35660450                 |                       | rs11739594  | 5    | 141709563           | FXYD5                    | 5.70                                                 | 0.07  | 0.17                       | 0.05  |
| FXYD5                | ILMN-2309848          | 19   | rs2285515  | 19   | 35660450  | 19   | 35660450                 |                       | rs13067700  | 3    | 95331048            | FXYD5                    | 6.00                                                 | 0.09  | 0.09                       | 0.51  |
| FXYD5                | ILMN-2309848          | 19   | rs2285515  | 19   | 35660450  | 19   | 35660450                 |                       | rs17036504  | 4    | 47567329            | FXYD5                    | 6.10                                                 | 0.28  | 0.08                       | 0.22  |
| G3BP2                | ILMN-2381758          | 4    | rs10230282 | 7    | 29390239  | 7    | 29390239                 |                       | rs1553985   | 4    | 76554604            | G3BP2                    | 5.19                                                 | 0.08  | 0.08                       | 0.14  |
| GAA                  | ILMN-2410783          | 17   | rs1150847  | 17   | 78153130  | 17   | 78153130                 | GAA                   | rs12602462  | 17   | 78146016            | GAA                      | 13.91                                                | 19.98 | 12.99                      | 32.60 |
| GAA                  | ILMN-2410783          | 17   | rs8068856  | 17   | 78100731  | 17   | 78100731                 |                       | rs10902506  | 12   | 132678089           | GAA                      | 5.65                                                 | 0.11  | 0.39                       | 0.17  |
| GAPT                 | ILMN-1675191          | 5    | rs0705522  | 5    | 57786110  | 5    | 57786110                 | GAPT                  | rs7605821   | 2    | 235695228           | GAPT                     | 5.85                                                 | 0.01  | 0.78                       | 0.28  |
| GAPT                 | ILMN-1675191          | 5    | rs0705522  | 5    | 57786110  | 5    | 57786110                 |                       | rs10070522  | 5    | 57786110            | GAPT                     | 5.72                                                 | 0.26  | 0.11                       | 0.11  |
| GATS                 | ILMN-1696631          | 7    | rs1147447  | 14   | 66460742  | 14   | 66460742                 | GATS                  | rs2906250   | 7    | 98827148            | GATS                     | 5.47                                                 | 0.83  | 0.63                       | 0.87  |
| GATS                 | ILMN-1696631          | 7    | rs8809626  | 7    | 30102802  | 7    | 30102802                 |                       | rs1970465   | 14   | 48572632            | GATS                     | 6.52                                                 | 0.35  | 0.35                       | 0.33  |
| GDPD3                | ILMN-1774901          | 16   | rs7204270  | 16   | 30158963  | 16   | 30158963                 | GDPD3                 | rs1015111   | 4    | 128972357           | GDPD3                    | 5.86                                                 | 0.55  | 0.09                       | 0.24  |
| GDPD3                | ILMN-1774901          | 16   | rs7204270  | 16   | 30158963  | 16   | 30158963                 |                       | rs1015111   | 4    | 128972357           | GDPD3                    | 5.78                                                 | 0.02  | 0.45                       | 0.13  |
| GNL1                 | ILMN-1790692          | 2    | rs4145072  | 13   | 110899955 | 13   | 110899955                | GNL1                  | rs757293    | 2    | 85935282            | GNL1                     | 5.72                                                 | 0.02  | 0.45                       | 0.13  |
| GPN3                 | ILMN-3299426          | 12   | rs7198646  | 16   | 26084476  | 16   | 26084476                 |                       | rs7960552   | 12   | 111164237           | GPN3                     | 5.49                                                 | 0.36  | 0.46                       | 0.39  |
| GPR162               | ILMN-1730816          | 12   | rs1860563  | 12   | 79685913  | 12   | 79685913                 |                       | rs2707210   | 12   | 6902002             | GPR162                   | 5.07                                                 | 0.25  | 0.03                       | 0.06  |
| GPR162               | ILMN-1730816          | 12   | rs2272500  | 12   | 6478898   | 12   | 6478898                  |                       | rs2707210   | 12   | 6902002             | GPR162                   | 5.07                                                 | 0.25  | 0.03                       | 0.06  |
| GPR162               | ILMN-1730816          | 12   | rs2707210  | 12   | 6478898   | 12   | 6478898                  |                       | rs740848    | 9    | 6554558             | GPR162                   | 5.47                                                 | 0.25  | 0.06                       | 0.07  |
| GPR162               | ILMN-1730816          | 12   | rs2707210  | 12   | 6478898   | 12   | 6478898                  |                       | rs9827054   | 3    | 188880113           | GPR162                   | 6.21                                                 | 0.96  | 0.06                       | 0.44  |
| GPR177               | ILMN-1660549          | 1    | rs11057383 | 12   | 6902002   | 12   | 6902002                  | GPR177                | rs12065581  | 1    | 68732819            | GPR177                   | 5.45                                                 | 0.72  | 0.67                       | 0.81  |
| GPR177               | ILMN-1660549          | 1    | rs12527241 | 6    | 120468039 | 6    | 120468039                |                       | rs12065581  | 1    | 68732819            | GPR177                   | 5.76                                                 | 0.17  | 0.40                       | 0.22  |
| GPR177               | ILMN-1660549          | 1    | rs12527241 | 6    | 120468039 | 6    | 120468039                |                       | rs12065581  | 1    | 68732819            | GPR177                   | 6.50                                                 | 0.79  | 1.43                       | 1.50  |
| GPR177               | ILMN-1660549          | 1    | rs725613   | 16   | 11169683  | 16   | 11169683                 |                       | rs12065581  | 1    | 68732819            | GPR177                   | 5.43                                                 | 0.31  | 0.11                       | 0.13  |
| GPR177               | ILMN-1660549          | 1    | rs9575097  | 13   | 82986268  | 13   | 82986268                 |                       | rs12065581  | 1    | 68732819            | GPR177                   | 6.04                                                 | 0.95  | 0.21                       | 0.60  |
| GPR177               | ILMN-2283325          | 1    | rs6566669  | 18   | 70506011  | 18   | 70506011                 |                       | rs12065581  | 1    | 68732819            | GPR177                   | 5.86                                                 | 0.24  | 0.34                       | 0.23  |
| GPR177               | ILMN-2283325          | 1    | rs6566669  | 18   | 70506011  | 18   | 70506011                 |                       | rs12065581  | 1    | 68732819            | GPR177                   | 5.86                                                 | 0.01  | 0.24                       | 0.04  |
| GSDMB                | ILMN-2347193          | 17   | rs290426   | 3    | 171399321 | 3    | 171399321                | GSDMB                 | rs4965745   | 15   | 101508261           | GSDMB                    | 5.88                                                 | 0.68  | 0.20                       | 0.41  |
| GSDMB                | ILMN-2347193          | 17   | rs1557467  | 17   | 38028634  | 17   | 38028634                 |                       | rs1101992   | 1    | 110266754           | GSDMB                    | 6.11                                                 | 0.27  | 0.19                       | 0.16  |
| GSDMB                | ILMN-2347193          | 17   | rs1557467  | 17   | 38028634  | 17   | 38028634                 |                       | rs1101992   | 1    | 110266754           | GSDMB                    | 6.11                                                 | 0.27  | 0.19                       | 0.16  |
| GSTM1                | ILMN-2391861          | 1    | rs1242673  | 10   | 53192853  | 10   | 53192853                 |                       | rs1101992   | 1    | 110266754           | GSTM1                    | 3.91                                                 | 0.27  | 1.14                       | 0.79  |
| GSTM1                | ILMN-2391861          | 1    | rs1547574  | 13   | 85344527  | 13   | 85344527                 |                       | rs1101992   | 1    | 110266754           | GSTM1                    | 6.36                                                 | 0.27  | 0.31                       | 0.23  |
| GSTM1                | ILMN-2391861          | 1    | rs6066667  | 13   | 33309079  | 13   | 33309079                 |                       | rs1101992   | 1    | 110266754           | GSTM1                    | 6.52                                                 | 0.25  | 0.48                       | 0.32  |
| GSTM2                | ILMN-1757467          | 22   | rs139858   | 22   | 38390979  | 22   | 38390979                 |                       | rs139858    | 2    | 77019015            | GSTM2                    | 6.36                                                 | 0.27  | 0.31                       | 0.23  |
| H1FO                 | ILMN-1757467          | 22   | rs139858   | 22   | 38390979  | 22   | 38390979                 |                       | rs6497007   | 15   | 19532546            | H1FO                     | 5.47                                                 | 0.00  | 0.66                       | 0.19  |
| H1FO                 | ILMN-1757467          | 22   | rs139858   | 22   | 38390979  | 22   | 38390979                 |                       | rs9839949   | 21   | 5271671             | H1FO                     | 5.47                                                 | 0.00  | 0.66                       | 0.19  |
| H1FO                 | ILMN-1757467          | 22   | rs139858   | 22   | 38390979  | 22   | 38390979                 |                       | rs2855039   | 11   | 5271671             | H1FO                     | 5.47                                                 | 0.00  | 0.66                       | 0.19  |
| H1FO                 | ILMN-1757467          | 22   | rs139858   | 22   | 38390979  | 22   | 38390979                 |                       | rs2855039   | 11   | 5271671             | H1FO                     | 5.47                                                 | 0.00  | 0.66                       | 0.19  |
| HBG1                 | ILMN-1796678          | 11   | rs1078523  | 17   | 4523167   | 17   | 4523167                  |                       | rs2855039   | 11   | 5271671             | HBG2                     | 6.78                                                 | 0.08  | 0.52                       | 0.21  |
| HBG1                 | ILMN-1796678          | 11   | rs2855039  | 11   | 5271671   | 11   | 5271671                  |                       | rs2855039   | 11   | 5271671             | HBG2                     | 6.78                                                 | 0.08  | 0.52                       | 0.21  |
| HBG1                 | ILMN-1796678          | 11   | rs2855039  | 11   | 5271671   | 11   | 5271671                  |                       | rs12042181  | 1    | 213088494           | LQK1                     | 6.42                                                 | 0.01  | 0.46                       | 0.11  |
| HBG1                 | ILMN-1796678          | 11   | rs2855039  | 11   | 5271671   | 11   | 5271671                  |                       | rs12042181  | 1    | 213088494           | LQK1                     | 6.42                                                 | 0.01  | 0.46                       | 0.11  |
| HBG2                 | ILMN-2084825          | 11   | rs11078523 | 17   | 4523167   | 17   | 4523167                  |                       | rs16912979  | 4    | 141533832           | HBG2                     | 6.06                                                 | 0.01  | 0.46                       | 0.11  |
| HBG2                 | ILMN-2084825          | 11   | rs11078523 | 17   | 4523167   | 17   | 4523167                  |                       | rs16912979  | 4    | 141533832           | HBG2                     | 6.06                                                 | 0.01  | 0.46                       | 0.11  |

Continued on next page

Table S1 – continued from previous page

| Gene ID <sup>a</sup> | Expression trait      |      |            | SNP 1 |                      |                          | SNP 2      |      |                      | Interaction statistic / = log <sub>10</sub> p-values |       |                       | Distance / Mpb |                    |
|----------------------|-----------------------|------|------------|-------|----------------------|--------------------------|------------|------|----------------------|------------------------------------------------------|-------|-----------------------|----------------|--------------------|
|                      | Probe ID <sup>b</sup> | Chr. | rs ID      | Chr.  | Pos/Mpb <sup>c</sup> | Association <sup>d</sup> | rs ID      | Chr. | Pos/Mpb <sup>c</sup> | Association <sup>d</sup>                             | BSCSe | Fehrmann <sup>e</sup> |                | EGCUT <sup>f</sup> |
| HBG2                 | ILMN-2084825          | 11   | rs12975066 | 19    | 3572330              | HBG2                     | rs2855039  | 11   | 5271671              | HBG2                                                 | 5.77  | 0.06                  | 0.13           | 0.05               |
| HBG2                 | ILMN-2084825          | 11   | rs2855039  | 11    | 5271671              | HBG2                     | rs12042181 | 1    | 213088494            | LQK1                                                 | 6.84  | 0.08                  | 0.54           | 0.21               |
| HDAC7                | ILMN-3266186          | 12   | rs2109029  | 16    | 6036851              | HDAC7                    | rs12503379 | 4    | 141513382            | HDAC7                                                | 5.98  | 0.00                  | 0.46           | 0.10               |
| HEBP1                | ILMN-1802557          | 12   | rs3752567  | 12    | 13145613             | HEBP1                    | rs4760636  | 12   | 48173352             | HEBP1                                                | 5.75  | 0.15                  | 0.59           | 0.32               |
| HEXDC                | ILMN-1741180          | 17   | rs1942719  | 18    | 71237270             | HEXDC                    | rs17686635 | 8    | 132220622            | HEXDC                                                | 5.81  | 1.61                  | 0.34           | 0.22               |
| HLA-DRA              | ILMN-171156           | 6    | rs4866092  | 18    | 71487912             | HLA-DRA                  | rs7230037  | 17   | 80576939             | HLA-DRA                                              | 5.84  | 0.00                  | 0.16           | 0.32               |
| HLA-F                | ILMN-1720059          | 8    | rs12435486 | 14    | 98670849             | HLA-F                    | rs5832404  | 6    | 24695719             | HLA-F                                                | 5.74  | 1.00                  | 0.47           | 0.36               |
| HMBOX1               | ILMN-1720059          | 8    | rs2837803  | 21    | 42112794             | HMBOX1                   | rs7837237  | 8    | 28876221             | HMBOX1                                               | 6.69  | 0.92                  | 1.11           | 1.34               |
| HMBOX1               | ILMN-1720059          | 8    | rs4765451  | 12    | 127237464            | HMBOX1                   | rs4732890  | 8    | 28751381             | HMBOX1                                               | 5.80  | 0.05                  | 1.01           | 0.46               |
| HMBOX1               | ILMN-1720059          | 8    | rs587639   | 8     | 132725731            | HMBOX1                   | rs1809444  | 8    | 28904086             | HMBOX1                                               | 5.80  | 0.39                  | 3.13           | 2.52               |
| HMBOX1               | ILMN-1720059          | 8    | rs8180944  | 8     | 28904086             | HMBOX1                   | rs7837237  | 8    | 28876221             | HMBOX1                                               | 6.88  | 0.55                  | 0.34           | 0.44               |
| HMBOX1               | ILMN-1720059          | 8    | rs8180944  | 8     | 28904086             | HMBOX1                   | rs4533956  | 3    | 189533772            | HMBOX1                                               | 6.12  | 3.38                  | 0.03           | 2.20               |
| HMBOX1               | ILMN-1720059          | 8    | rs9521666  | 13    | 110897444            | HMBOX1                   | rs7810884  | 7    | 158276926            | HMBOX1                                               | 6.12  | 0.37                  | 0.66           | 0.52               |
| HNRP1                | ILMN-2101920          | 5    | rs6894268  | 5     | 179032488            | HNRP1                    | rs8180944  | 8    | 28904086             | HNRP1                                                | 5.45  | 0.64                  | 0.26           | 0.45               |
| HSPC157              | ILMN-3194087          | 1    | rs555812   | 16    | 8882257              | HSPC157                  | rs4700810  | 5    | 178991794            | HSPC157                                              | 15.38 | 8.55                  | 3.01           | 10.37              |
| HSPC157              | ILMN-3194087          | 1    | rs6063164  | 20    | 46486900             | HSPC157                  | rs4654783  | 1    | 22439520             | HSPC157                                              | 6.51  |                       |                |                    |
| HSPC157              | ILMN-3194087          | 1    | rs662739   | 12    | 121229893            | HSPC157                  | rs4654783  | 1    | 22439520             | HSPC157                                              | 6.61  |                       |                |                    |
| HSPC157              | ILMN-3194087          | 1    | rs7088558  | 10    | 101884937            | HSPC157                  | rs4654783  | 1    | 22439520             | HSPC157                                              | 6.48  |                       |                |                    |
| IL32                 | ILMN-2368530          | 16   | rs1554999  | 16    | 3115628              | IL32                     | rs4759890  | 12   | 131757163            | IL32                                                 | 6.90  | 0.19                  | 0.50           | 0.29               |
| INPP5E               | ILMN-1811301          | 9    | rs8044524  | 19    | 2560423              | INPP5E                   | rs1554999  | 16   | 3115628              | INPP5E                                               | 5.53  | 0.69                  | 0.23           | 0.44               |
| JAZF1                | ILMN-1682727          | 7    | rs757355   | 12    | 47970693             | JAZF1                    | rs1127152  | 7    | 28288174             | JAZF1                                                | 5.58  | 1.46                  | 0.84           | 1.55               |
| KIF26L5              | ILMN-1675756          | 21   | rs2186344  | 21    | 8459719              | KIF26L5                  | rs449341   | 7    | 28288174             | KIF26L5                                              | 8.16  | 0.02                  | 0.26           | 0.05               |
| KTELC1               | ILMN-1811104          | 3    | rs6815093  | 13    | 8459719              | KTELC1                   | rs4242690  | 11   | 18570774             | KTELC1                                               | 5.94  | 0.65                  | 0.13           | 0.33               |
| KTELC1               | ILMN-1811104          | 3    | rs6815093  | 13    | 8459719              | KTELC1                   | rs4242690  | 11   | 18570774             | KTELC1                                               | 5.53  | 0.96                  | 0.77           | 0.37               |
| KTELC1               | ILMN-1811104          | 3    | rs6815093  | 13    | 8459719              | KTELC1                   | rs27005    | 4    | 119119433            | KTELC1                                               | 5.45  | 0.06                  | 0.80           | 0.37               |
| L3MBTL2              | ILMN-2336109          | 22   | rs4822006  | 22    | 41519362             | L3MBTL2                  | rs6414838  | 3    | 119119433            | L3MBTL2                                              | 5.88  | 0.64                  | 0.08           | 0.28               |
| LAP3                 | ILMN-1683792          | 4    | rs7042087  | 9     | 132602868            | LAP3                     | rs1294838  | 4    | 17588950             | LAP3                                                 | 5.88  | 0.34                  | 0.04           | 0.09               |
| LAX1                 | ILMN-1769782          | 1    | rs1891432  | 1     | 203877662            | LAX1                     | rs7658240  | 4    | 17588950             | LAX1                                                 | 5.72  | 0.24                  | 0.47           | 0.31               |
| LDLRAP1              | ILMN-1809040          | 1    | rs1552032  | 15    | 59971635             | LDLRAP1                  | rs10900520 | 1    | 203780591            | LDLRAP1                                              | 19.16 | 18.60                 | 11.22          | 29.24              |
| LDLRAP1              | ILMN-2412214          | 17   | rs12450521 | 17    | 26083392             | LDLRAP1                  | rs6876605  | 5    | 179608360            | LDLRAP1                                              | 6.00  | 0.35                  | 0.40           | 0.34               |
| LILRA5               | ILMN-2357419          | 19   | rs3859532  | 19    | 54827248             | LILRA5                   | rs11749727 | 5    | 179608360            | LILRA5                                               | 5.16  | 0.23                  | 0.03           | 0.05               |
| LILRA5               | ILMN-2338197          | 15   | rs11247226 | 15    | 101120963            | LILRA5                   | rs714789   | 18   | 71561497             | LILRA5                                               | 6.13  | 0.23                  | 0.13           | 0.33               |
| LRRC25               | ILMN-2150196          | 19   | rs6009951  | 22    | 51151350             | LRRC25                   | rs1278387  | 10   | 127804531            | LRRC25                                               | 5.89  | 0.11                  | 0.35           | 0.15               |
| LRRC25               | ILMN-1807825          | 6    | rs977785   | 6     | 6588881              | LRRC25                   | rs8101804  | 19   | 18496107             | LRRC25                                               | 5.61  | 0.13                  | 0.15           | 0.07               |
| LYZ                  | ILMN-1815205          | 12   | rs2168029  | 12    | 69734641             | LYZ                      | rs1543675  | 1    | 78946879             | LYZ                                                  | 5.61  | 0.15                  | 0.03           | 0.03               |
| LYZ                  | ILMN-2162972          | 12   | rs177820   | 18    | 77276964             | LYZ                      | rs11981725 | 7    | 154137150            | LYZ                                                  | 5.71  | 0.49                  | 0.03           | 0.16               |
| LYZ                  | ILMN-2162972          | 12   | rs2168029  | 12    | 69734641             | LYZ                      | rs2168029  | 12   | 69734641             | LYZ                                                  | 6.31  | 0.61                  | 0.36           | 0.49               |
| MAD2L1L1             | ILMN-2358069          | 7    | rs7783715  | 7     | 1923385              | MAD2L1L1                 | rs2253135  | 9    | 130319560            | MAD2L1L1                                             | 5.62  | 0.25                  | 0.88           | 0.59               |
| MAD2L1L1             | ILMN-1694711          | 6    | rs7983718  | 13    | 103203146            | MAD2L1L1                 | rs6414306  | 6    | 43528441             | MAD2L1L1                                             | 5.93  | 0.63                  | 1.11           | 1.09               |
| MAD2L1L1             | ILMN-1776188          | 20   | rs974607   | 21    | 29435869             | MAD2L1L1                 | rs1096699  | 6    | 43528441             | MAD2L1L1                                             | 5.78  | 0.25                  | 0.88           | 0.59               |
| MEN1                 | ILMN-2313158          | 3    | rs10869600 | 3     | 78239815             | MEN1                     | rs6060034  | 20   | 33531864             | MEN1                                                 | 5.78  | 0.79                  | 0.97           | 0.54               |
| MEN1                 | ILMN-2313158          | 3    | rs1164546  | 19    | 97406810             | MEN1                     | rs13069559 | 3    | 152187431            | MEN1                                                 | 7.96  | 0.79                  | 2.21           | 1.57               |
| MEN1                 | ILMN-2313158          | 3    | rs11981513 | 13    | 97406810             | MEN1                     | rs13069559 | 3    | 152187431            | MEN1                                                 | 7.58  | 1.48                  | 5.36           | 1.34               |
| MEN1                 | ILMN-2313158          | 3    | rs11981513 | 13    | 97406810             | MEN1                     | rs13069559 | 3    | 152187431            | MEN1                                                 | 7.71  | 0.43                  | 5.36           | 4.58               |
| MEN1                 | ILMN-2313158          | 3    | rs16864367 | 7     | 152234166            | MEN1                     | rs13069559 | 3    | 152187431            | MEN1                                                 | 13.40 | 16.25                 | 24.74          | 41.56              |
| MEN1                 | ILMN-2313158          | 3    | rs2030926  | 6     | 114067127            | MEN1                     | rs13069559 | 3    | 152187431            | MEN1                                                 | 7.10  | 0.91                  | 5.80           | 5.53               |
| MEN1                 | ILMN-2313158          | 3    | rs218671   | 7     | 6604708              | MEN1                     | rs13069559 | 3    | 152187431            | MEN1                                                 | 7.63  | 0.62                  | 5.82           | 5.23               |
| MEN1                 | ILMN-2313158          | 3    | rs2213360  | 22    | 34291750             | MEN1                     | rs13069559 | 3    | 152187431            | MEN1                                                 | 6.05  | 0.52                  | 0.72           | 0.70               |
| MEN1                 | ILMN-2313158          | 3    | rs2305802  | 19    | 16038535             | MEN1                     | rs13069559 | 3    | 152187431            | MEN1                                                 | 6.94  | 1.67                  | 0.72           | 0.70               |
| MEN1                 | ILMN-2313158          | 3    | rs2614467  | 14    | 99770138             | MEN1                     | rs13069559 | 3    | 152187431            | MEN1                                                 | 5.74  | 4.13                  | 2.22           | 5.30               |

Continued on next page

Table S1 – continued from previous page

| Gene ID <sup>a</sup> | Expression trait      |      | SNP 1       |      | SNP 2     |            | Association <sup>d</sup> |                          | rs ID    | Chr. | Pos/Mb <sup>c</sup> | Association <sup>d</sup> | Interaction statistic / = log <sub>10</sub> P-values |                       | Distance / Mpb |                    |
|----------------------|-----------------------|------|-------------|------|-----------|------------|--------------------------|--------------------------|----------|------|---------------------|--------------------------|------------------------------------------------------|-----------------------|----------------|--------------------|
|                      | Probe ID <sup>b</sup> | Chr. | rs ID       | Chr. | rs ID     | Chr.       | Pos/Mb <sup>c</sup>      | Association <sup>d</sup> |          |      |                     |                          | BSCSe                                                | Fehrmann <sup>e</sup> |                | EGCUT <sup>f</sup> |
| MBNL1                | ILMN_2313158          | 3    | rs4392535   | 4    | 41513423  | rs13069559 | 3                        | 152187431                | MBNL1    | 3    | 152187431           | MBNL1                    | 8.39                                                 | 0.02                  | 4.33           | 3.02               |
| MBNL1                | ILMN_2313158          | 3    | rs4735830   | 4    | 895841    | rs13069559 | 3                        | 152187431                | MBNL1    | 3    | 152187431           | MBNL1                    | 6.74                                                 | 0.03                  | 4.21           | 3.38               |
| MBNL1                | ILMN_2313158          | 3    | rs4939558   | 18   | 46278591  | rs15223374 | 3                        | 152233530                | MBNL1    | 3    | 152233530           | MBNL1                    | 7.72                                                 | 0.03                  | 0.27           | 0.07               |
| MBNL1                | ILMN_2313158          | 3    | rs7710738   | 20   | 57523132  | rs15223374 | 3                        | 152233530                | MBNL1    | 3    | 152233530           | MBNL1                    | 7.22                                                 | 1.34                  | 1.15           | 1.73               |
| MBP                  | ILMN_2331344          | 3    | rs6079849   | 5    | 22101322  | rs2051344  | 18                       | 74715653                 | MBP      | 18   | 74715653            | MBP                      | 7.92                                                 | 2.55                  | 7.89           | 9.28               |
| MBP                  | ILMN_2331344          | 18   | rs303968    | 20   | 15402611  | rs2051344  | 18                       | 74715653                 | MBP      | 18   | 74715653            | MBP                      | 6.26                                                 | 0.10                  | 0.03           | 0.02               |
| MBP                  | ILMN_2398939          | 18   | rs2031344   | 18   | 74715653  | rs2051344  | 18                       | 74715653                 | MBP      | 18   | 74715653            | MBP                      | 7.72                                                 | 0.03                  | 0.23           | 0.27               |
| MBP                  | ILMN_2398939          | 18   | rs2051344   | 18   | 74715653  | rs2051344  | 18                       | 74715653                 | MBP      | 18   | 74715653            | MBP                      | 6.03                                                 | 0.15                  | 0.50           | 0.26               |
| MBP                  | ILMN_2398939          | 18   | rs405021    | 19   | 33483667  | rs2051344  | 18                       | 74715653                 | MBP      | 18   | 74715653            | MBP                      | 5.82                                                 | 0.03                  | 0.47           | 0.14               |
| MBP                  | ILMN_2398939          | 18   | rs8092433   | 18   | 74747424  | rs4890876  | 18                       | 74732087                 | MBP      | 18   | 74732087            | MBP                      | 5.40                                                 | 7.06                  | 21.91          | 28.73              |
| MEGF9                | ILMN_2290118          | 9    | rs13039689  | 20   | 51922071  | rs4890876  | 18                       | 74732087                 | MEGF9    | 9    | 123453281           | MEGF9                    | 4.63                                                 | 1.13                  | 1.33           | 1.71               |
| MEGF9                | ILMN_1651385          | 1    | rs7989895   | 13   | 109401737 | rs4890876  | 18                       | 74732087                 | MEGF9    | 9    | 123453281           | MEGF9                    | 5.76                                                 | 0.61                  | 0.25           | 0.41               |
| MGC13057             | ILMN_1787526          | 2    | rs12718598  | 7    | 50428445  | rs11725347 | 4                        | 171860973                | MGC13057 | 4    | 171860973           | MGC13057                 | 5.81                                                 | 0.13                  | 0.30           | 0.14               |
| MGC13057             | ILMN_1787526          | 2    | rs674608    | 18   | 69070772  | rs12718598 | 7                        | 50428445                 | MGC13057 | 4    | 171860973           | MGC13057                 | 5.57                                                 | 0.07                  | 1.03           | 0.50               |
| MGC13057             | ILMN_1787526          | 2    | rs8058318   | 16   | 82628245  | rs12718598 | 7                        | 50428445                 | MGC13057 | 4    | 171860973           | MGC13057                 | 7.05                                                 | 0.11                  | 0.12           | 0.05               |
| MGC13057             | ILMN_1688318          | 20   | rs845787    | 20   | 26197931  | rs2660665  | 8                        | 137526799                | MGC13057 | 4    | 171860973           | MGC13057                 | 4.17                                                 | 0.05                  | 0.08           | 0.02               |
| MGST3                | ILMN_1751956          | 1    | rs740441    | 17   | 55779644  | rs4147592  | 1                        | 165600146                | MGST3    | 1    | 165600146           | MGST3                    | 5.45                                                 | 0.57                  | 0.27           | 0.40               |
| MGST3                | ILMN_1752982          | 11   | rs1805      | 11   | 118076069 | rs11771552 | 7                        | 154708716                | MGST3    | 1    | 165600146           | MGST3                    | 5.90                                                 | 0.01                  | 0.23           | 0.04               |
| MRPL2                | ILMN_1752982          | 11   | rs7316716   | 12   | 19953193  | rs1805     | 11                       | 118076069                | MRPL2    | 11   | 118076069           | MRPL2                    | 5.64                                                 | 0.97                  | 1.08           | 1.35               |
| MRPL2                | ILMN_1800197          | 5    | rs17469061  | 10   | 8436432   | rs1805     | 11                       | 118076069                | MRPL2    | 11   | 118076069           | MRPL2                    | 6.89                                                 | 0.34                  | 0.18           | 0.19               |
| MRPL3                | ILMN_2258774          | 10   | rs6564769   | 16   | 80641040  | rs2863095  | 10                       | 102746503                | MRPL3    | 10   | 102746503           | MRPL3                    | 5.71                                                 | 0.26                  | 0.14           | 0.22               |
| MRPL52               | ILMN_1713966          | 14   | rs1950857   | 14   | 26710271  | rs2863095  | 10                       | 102746503                | MRPL52   | 14   | 26710271            | MRPL52                   | 6.56                                                 | 0.14                  | 0.14           | 0.44               |
| MRPL52               | ILMN_1663664          | 6    | rs1095512   | 8    | 110202210 | rs3811188  | 14                       | 42194916                 | MRPL52   | 14   | 26710271            | MRPL52                   | 7.48                                                 | 0.46                  | 0.70           | 0.64               |
| MRPS10               | ILMN_1663664          | 6    | rs11698159  | 20   | 50652114  | rs222269   | 6                        | 42194916                 | MRPS10   | 6    | 42194916            | MRPS10                   | 6.85                                                 | 0.31                  | 0.63           | 0.46               |
| MRPS10               | ILMN_1663664          | 6    | rs11698159  | 20   | 50652114  | rs222269   | 6                        | 42194916                 | MRPS10   | 6    | 42194916            | MRPS10                   | 7.48                                                 | 0.31                  | 0.63           | 0.46               |
| MTMR15               | ILMN_2159175          | 15   | rs178397    | 15   | 31215935  | rs1213144  | 14                       | 42068689                 | MTMR15   | 15   | 31215935            | MTMR15                   | 5.18                                                 | 1.87                  | 1.87           | 2.86               |
| MX1                  | ILMN_1662358          | 21   | rs459498    | 21   | 42795027  | rs11160227 | 14                       | 95514596                 | MX1      | 21   | 42795027            | MX1                      | 6.31                                                 | 0.46                  | 0.59           | 0.50               |
| MX1                  | ILMN_1662358          | 21   | rs459498    | 21   | 42795027  | rs4973801  | 3                        | 26706382                 | MX1      | 21   | 42795027            | MX1                      | 5.83                                                 | 0.11                  | 0.50           | 0.23               |
| MYBPC3               | ILMN_1781184          | 11   | rs10134030  | 14   | 61593110  | rs130120   | 21                       | 29363604                 | MYBPC3   | 11   | 47486885            | MYBPC3                   | 6.78                                                 | 0.29                  | 0.92           | 0.65               |
| MYBPC3               | ILMN_1781184          | 11   | rs7322768   | 13   | 109550561 | rs1317149  | 11                       | 47486885                 | MYBPC3   | 11   | 47486885            | MYBPC3                   | 5.56                                                 | 0.13                  | 0.46           | 0.23               |
| MYOM1                | ILMN_1680344          | 18   | rs4798075   | 18   | 3247256   | rs7124681  | 11                       | 47529947                 | MYOM1    | 18   | 3247256             | MYOM1                    | 5.70                                                 | 0.04                  | 0.08           | 0.02               |
| N4BP1                | ILMN_2201966          | 16   | rs12444224  | 16   | 87580855  | rs2737422  | 8                        | 134485237                | N4BP1    | 16   | 87580855            | N4BP1                    | 6.02                                                 | 0.74                  | 0.15           | 0.40               |
| NAAA                 | ILMN_1668605          | 4    | rs2071856   | 22   | 37770630  | rs11649236 | 16                       | 48632478                 | NAAA     | 4    | 76870229            | NAAA                     | 5.54                                                 | 2.00                  | 0.59           | 1.77               |
| NAAA                 | ILMN_2391512          | 4    | rs2123758   | 8    | 144663661 | rs6826085  | 4                        | 76870229                 | NAAA     | 4    | 76870229            | NAAA                     | 5.65                                                 | 0.27                  | 0.43           | 0.30               |
| NAPRT1               | ILMN_1710752          | 8    | rs2123758   | 8    | 144663661 | rs2786014  | 1                        | 234897243                | NAPRT1   | 8    | 144663661           | NAPRT1                   | 5.46                                                 | 0.07                  | 0.43           | 0.30               |
| NAPRT1               | ILMN_1710752          | 8    | rs2123758   | 8    | 144663661 | rs3889129  | 8                        | 144613680                | NAPRT1   | 8    | 144613680           | NAPRT1                   | 6.08                                                 | 0.07                  | 0.48           | 0.18               |
| NAPRT1               | ILMN_1710752          | 8    | rs2123758   | 8    | 144663661 | rs4862705  | 4                        | 187445552                | NAPRT1   | 8    | 144663661           | NAPRT1                   | 8.45                                                 | 15.12                 | 16.08          | 30.77              |
| NAPRT1               | ILMN_1710752          | 8    | rs2123758   | 8    | 144663661 | rs6455553  | 6                        | 167811764                | NAPRT1   | 8    | 144663661           | NAPRT1                   | 6.12                                                 | 1.27                  | 0.19           | 0.81               |
| NAPRT1               | ILMN_1710752          | 8    | rs2123758   | 8    | 144663661 | rs700276   | 7                        | 146189057                | NAPRT1   | 8    | 144663661           | NAPRT1                   | 6.86                                                 | 1.10                  | 2.58           | 2.77               |
| NAPRT1               | ILMN_1710752          | 8    | rs2208123   | 22   | 48214812  | rs7571561  | 7                        | 146189057                | NAPRT1   | 8    | 144663661           | NAPRT1                   | 6.03                                                 | 1.03                  | 0.47           | 0.23               |
| NAPRT1               | ILMN_1710752          | 8    | rs4734240   | 9    | 103488069 | rs2123758  | 8                        | 144663661                | NAPRT1   | 8    | 144663661           | NAPRT1                   | 6.00                                                 | 0.29                  | 0.88           | 0.63               |
| NAPRT1               | ILMN_1710752          | 8    | rs103488069 | 9    | 103488069 | rs2123758  | 8                        | 144663661                | NAPRT1   | 8    | 144663661           | NAPRT1                   | 5.50                                                 | 0.12                  | 0.17           | 0.08               |
| NAPSB                | ILMN_2109416          | 19   | rs1405655   | 19   | 50882619  | rs10882406 | 6                        | 96976932                 | NAPSB    | 19   | 50882619            | NAPSB                    | 5.58                                                 | 0.62                  | 1.10           | 1.92               |
| NAPSB                | ILMN_2109416          | 19   | rs1405655   | 19   | 50882619  | rs577137   | 10                       | 96976932                 | NAPSB    | 19   | 50882619            | NAPSB                    | 5.58                                                 | 2.11                  | 1.44           | 1.71               |
| NCL                  | ILMN_2121437          | 2    | rs563453    | 2    | 232301670 | rs4973397  | 7                        | 331107847                | NCL      | 2    | 232301670           | NCL                      | 7.31                                                 | 7.51                  | 6.33           | 12.70              |
| NDUFA12              | ILMN_1737738          | 12   | rs2746971   | 22   | 37101807  | rs11107847 | 12                       | 95386791                 | NDUFA12  | 12   | 95386791            | NDUFA12                  | 3.88                                                 | 0.39                  | 0.18           | 0.22               |
| NOD2                 | ILMN_1656378          | 10   | rs10906857  | 10   | 152394857 | rs12490878 | 3                        | 183114008                | NOD2     | 10   | 152394857           | NOD2                     | 6.84                                                 | 0.42                  | 0.34           | 0.35               |
| NOD2                 | ILMN_1762594          | 16   | rs2967636   | 19   | 7067773   | rs9302752  | 16                       | 65133822                 | NOD2     | 16   | 65133822            | NOD2                     | 5.90                                                 | 0.24                  | 0.04           | 0.06               |
| NRBF2                | ILMN_3237385          | 10   | rs11063498  | 12   | 5209048   | rs7923609  | 10                       | 65133822                 | NRBF2    | 10   | 65133822            | NRBF2                    | 5.45                                                 | 0.04                  | 0.04           | 0.06               |
| NRBF2                | ILMN_3237385          | 10   | rs2375269   | 11   | 69876894  | rs7923609  | 10                       | 65133822                 | NRBF2    | 10   | 65133822            | NRBF2                    | 5.53                                                 | 0.04                  | 0.04           | 0.06               |

Continued on next page



Table S1 – continued from previous page

| Gene ID <sup>a</sup> | Expression trait      |      | SNP 1       |      | SNP 2      |      | Association <sup>d</sup> |      | Association <sup>d</sup> |                     | Interaction statistic / = log <sub>10</sub> p-values |                       | Distance / Mpb |                    |
|----------------------|-----------------------|------|-------------|------|------------|------|--------------------------|------|--------------------------|---------------------|------------------------------------------------------|-----------------------|----------------|--------------------|
|                      | Probe ID <sup>b</sup> | Chr. | rs ID       | Chr. | rs ID      | Chr. | rs ID                    | Chr. | Pos/Mb <sup>c</sup>      | Pos/Mb <sup>c</sup> | BSCSe                                                | Fehrmann <sup>e</sup> |                | EGCUT <sup>f</sup> |
| NRBF2                | ILMN_3237385          | 10   | rs6025645   | 20   | 56157341   | 10   | rs7932609                | 10   | 65133822                 | NRBF2               | 5.45                                                 | 0.47                  | 0.05           |                    |
| NRBF2                | ILMN_3237385          | 10   | rs6517815   | 21   | 198190116  | 10   | rs9236009                | 10   | 65133822                 | NRBF2               | 6.11                                                 | 0.47                  | 0.05           |                    |
| NRD1                 | ILMN_1800897          | 1    | rs4852124   | 2    | 240680022  | 1    | rs20680022               | 1    | 52333407                 | NRD1                | 6.13                                                 | 0.03                  | 0.46           | 0.17               |
| NRD1T18              | ILMN_1787885          | 8    | rs5017351   | 11   | 25433482   | 8    | rs1005901                | 8    | 21964378                 | NRD1T18             | 5.44                                                 | 1.27                  | 1.55           | 2.03               |
| OAS1                 | ILMN_1658247          | 12   | rs11613438  | 12   | 1134860510 | 12   | rs1047944                | 12   | 163997407                | OAS1                | 4.59                                                 | 4.12                  | 0.81           | 3.86               |
| OAS1                 | ILMN_1658247          | 12   | rs133116233 | 12   | 1134860510 | 12   | rs2072133                | 12   | 113409260                | OAS1                | 4.83                                                 | 0.16                  | 0.16           | 0.14               |
| OAS1                 | ILMN_2381899          | 16   | rs2592633   | 16   | 71236236   | 16   | rs7512962                | 16   | 13169066                 | OAS1                | 5.42                                                 | 0.42                  | 0.06           | 0.14               |
| OSBP1                | ILMN_2307082          | 11   | rs2829679   | 11   | 26682543   | 11   | rs988639                 | 11   | 3149249                  | OSBP1               | 5.00                                                 | 0.36                  | 0.00           | 0.07               |
| OSBP1                | ILMN_2307082          | 11   | rs17780195  | 17   | 70624189   | 11   | rs273770                 | 11   | 3149249                  | OSBP1               | 5.42                                                 | 0.16                  | 0.87           | 0.49               |
| OSTF1                | ILMN_1742456          | 9    | rs2273770   | 9    | 77755469   | 9    | rs7718088                | 9    | 177950952                | OSTF1               | 5.42                                                 | 1.20                  | 0.08           | 0.62               |
| OSTF1                | ILMN_1742456          | 9    | rs10802822  | 1    | 240132968  | 9    | rs2718088                | 9    | 177950952                | OSTF1               | 5.43                                                 | 0.13                  | 1.48           | 0.88               |
| OVGP1                | ILMN_1734542          | 1    | rs347331    | 3    | 140148107  | 1    | rs1264898                | 1    | 111992823                | OVGP1               | 6.04                                                 | 0.25                  | 1.21           | 0.82               |
| OVGP1                | ILMN_1734542          | 1    | rs28092     | 5    | 102149795  | 1    | rs1264898                | 1    | 111992823                | OVGP1               | 6.04                                                 | 0.25                  | 1.21           | 0.82               |
| PAM                  | ILMN_2313901          | 5    | rs2438490   | 5    | 148726162  | 5    | rs7846000                | 5    | 40139553                 | PAM                 | 5.59                                                 | 0.66                  | 0.44           | 0.59               |
| PCYOX1L              | ILMN_1815951          | 5    | rs10444467  | 12   | 128062636  | 3    | rs2731939                | 3    | 21395989                 | PCYOX1L             | 6.20                                                 | 0.19                  | 0.26           | 0.16               |
| PEX5                 | ILMN_1660232          | 12   | rs7495797   | 15   | 27246462   | 12   | rs4329748                | 12   | 7364442                  | PEX5                | 5.85                                                 | 0.09                  | 0.71           | 0.32               |
| PEX5                 | ILMN_1660232          | 12   | rs131969    | 22   | 49151303   | 12   | rs4329748                | 12   | 7364442                  | PEX5                | 5.74                                                 | 0.34                  | 0.09           | 0.13               |
| PFAAP5               | ILMN_1797893          | 13   | rs132982353 | 19   | 46529456   | 13   | rs7328733                | 13   | 33126737                 | PFAAP5              | 5.64                                                 | 0.87                  | 0.36           | 0.67               |
| PGLYRP1              | ILMN_1704870          | 19   | rs1493642   | 11   | 123097386  | 14   | rs1263806                | 14   | 21982957                 | PGLYRP1             | 6.51                                                 | 0.03                  | 0.65           | 0.24               |
| PGLYRP1              | ILMN_1704870          | 19   | rs1493642   | 11   | 123097386  | 14   | rs10736812               | 11   | 61728597                 | PGLYRP1             | 5.51                                                 | 0.36                  | 0.90           | 0.70               |
| PIK3IP1              | ILMN_1812552          | 11   | rs4141404   | 22   | 31675185   | 11   | rs2065841                | 11   | 61728597                 | PIK3IP1             | 5.60                                                 | 0.20                  | 0.01           | 0.03               |
| PIK3IP1              | ILMN_1812552          | 11   | rs470072    | 22   | 32263131   | 14   | rs10498313               | 14   | 30398876                 | PIK3IP1             | 5.23                                                 | 0.02                  | 0.87           | 0.33               |
| PIK3IP1              | ILMN_1793934          | 22   | rs6518752   | 22   | 31999127   | 14   | rs10498313               | 14   | 30398876                 | PIK3IP1             | 5.23                                                 | 0.02                  | 0.87           | 0.33               |
| PISD                 | ILMN_1774604          | 22   | rs15572     | 22   | 33234631   | 22   | rs6518754                | 22   | 32097775                 | PISD                | 7.11                                                 | 0.00                  | 1.19           | 0.48               |
| PISD                 | ILMN_1774604          | 22   | rs6869411   | 3    | 158781604  | 22   | rs4672884                | 22   | 32097775                 | PISD                | 4.12                                                 | 0.05                  | 0.42           | 0.15               |
| PKDL7                | ILMN_1675656          | 14   | rs103198    | 16   | 49689255   | 2    | rs1478284                | 2    | 219182481                | PKDL7               | 6.35                                                 | 0.16                  | 0.04           | 0.04               |
| PP2R5A               | ILMN_1675656          | 14   | rs12914603  | 20   | 49689255   | 9    | rs758001                 | 9    | 14750990                 | PP2R5A              | 3.44                                                 | 0.20                  | 0.33           | 0.26               |
| PP2R5A               | ILMN_1675656          | 14   | rs10930170  | 15   | 58339496   | 14   | rs11156875               | 14   | 35619816                 | PP2R5A              | 5.81                                                 | 0.44                  | 0.20           | 0.33               |
| PP2R5A               | ILMN_1738784          | 1    | rs12423255  | 2    | 166399467  | 1    | rs12120009               | 1    | 212447167                | PP2R5A              | 5.63                                                 | 0.72                  | 0.48           | 0.66               |
| PP2R5A               | ILMN_1738784          | 1    | rs12423255  | 2    | 166399467  | 1    | rs12120009               | 1    | 212447167                | PP2R5A              | 5.72                                                 | 0.08                  | 0.95           | 0.46               |
| PP2R5A               | ILMN_1738784          | 1    | rs1889083   | 13   | 66222691   | 1    | rs12120009               | 1    | 212447167                | PP2R5A              | 5.61                                                 | 0.36                  | 0.13           | 0.17               |
| PP2R5A               | ILMN_1738784          | 1    | rs682334    | 11   | 107417238  | 1    | rs12120009               | 1    | 212447167                | PP2R5A              | 5.65                                                 | 0.69                  | 0.28           | 1.21               |
| PP2R5A               | ILMN_1738784          | 1    | rs7757871   | 6    | 135030045  | 1    | rs12120009               | 1    | 212447167                | PP2R5A              | 5.65                                                 | 0.37                  | 0.06           | 0.12               |
| PP2R5A               | ILMN_1738784          | 1    | rs7871178   | 9    | 27148475   | 1    | rs12120009               | 1    | 212447167                | PP2R5A              | 5.95                                                 | 0.36                  | 0.30           | 0.16               |
| PRDX5                | ILMN_1711606          | 16   | rs219823    | 14   | 95040482   | 11   | rs11600990               | 11   | 64082807                 | PRDX5               | 5.72                                                 | 0.16                  | 0.44           | 0.44               |
| PRDX5                | ILMN_1711606          | 16   | rs219823    | 14   | 95040482   | 11   | rs11600990               | 11   | 64082807                 | PRDX5               | 6.43                                                 | 0.81                  | 0.11           | 0.25               |
| PRMT2                | ILMN_1675038          | 21   | rs2839372   | 21   | 47931653   | 16   | rs10492793               | 16   | 12639800                 | PRMT2               | 7.34                                                 | 0.53                  | 0.11           | 0.44               |
| PRMT2                | ILMN_1675038          | 21   | rs3862607   | 11   | 121774705  | 18   | rs958127                 | 18   | 31497346                 | PRMT2               | 5.60                                                 | 0.19                  | 0.03           | 0.06               |
| PSMB1                | ILMN_1789176          | 6    | rs4890648   | 18   | 43983862   | 21   | rs11701058               | 21   | 47776382                 | PSMB1               | 4.81                                                 | 0.69                  | 4.47           | 0.04               |
| PSMB1                | ILMN_1789176          | 6    | rs6060930   | 20   | 30347832   | 6    | rs13207114               | 6    | 170877444                | PSMB1               | 5.79                                                 | 0.00                  | 0.44           | 0.04               |
| PSMB1                | ILMN_1789176          | 6    | rs6928843   | 6    | 170890384  | 6    | rs6928843                | 6    | 170890384                | PSMB1               | 5.14                                                 | 0.44                  | 0.21           | 0.27               |
| PSMB1                | ILMN_1789176          | 6    | rs7239749   | 6    | 170890384  | 6    | rs9258415                | 6    | 170823379                | PSMB1               | 5.44                                                 | 1.95                  | 0.64           | 1.78               |
| PSMB1                | ILMN_1789176          | 6    | rs2335567   | 12   | 131727816  | 6    | rs1207114                | 6    | 170877444                | PSMB1               | 5.42                                                 | 1.18                  | 0.32           | 0.86               |
| PSBP1                | ILMN_1743049          | 12   | rs4353567   | 14   | 96478823   | 11   | rs11036212               | 11   | 3221825                  | PSBP1               | 5.00                                                 | 0.03                  | 0.48           | 0.13               |
| PSBP1                | ILMN_1743049          | 12   | rs631625    | 17   | 126823438  | 11   | rs11036212               | 11   | 3221825                  | PSBP1               | 5.70                                                 | 0.09                  | 0.40           | 0.31               |
| PWP1                 | ILMN_1743049          | 12   | rs4946705   | 11   | 106348248  | 11   | rs10020773               | 4    | 17526682                 | PWP1                | 5.75                                                 | 1.03                  | 1.25           | 1.55               |
| QDPR                 | ILMN_1672443          | 4    | rs4946705   | 6    | 106348248  | 12   | rs3305307                | 12   | 70235726                 | QDPR                | 6.55                                                 | 0.25                  | 0.08           | 0.09               |
| RAB3IP               | ILMN_1803197          | 12   | rs2417530   | 22   | 33375704   | 12   | rs3305307                | 12   | 70235726                 | RAB3IP              | 6.42                                                 | 0.28                  | 0.84           | 0.59               |
| RAB3IP               | ILMN_1803197          | 12   | rs1075728   | 19   | 42462788   | 11   | rs7951628                | 11   | 12016117                 | RAB3IP              | 6.38                                                 | 0.03                  | 0.31           | 0.08               |
| RBL2                 | ILMN_1756999          | 16   | rs9931702   | 16   | 5526551    | 15   | rs1863464                | 15   | 26938488                 | RBL2                | 5.23                                                 | 0.58                  | 0.37           | 0.47               |
| RCN1                 | ILMN_1800276          | 11   | rs10879131  | 12   | 41147155   | 11   | rs4922579                | 11   | 32136436                 | RCN1                | 5.33                                                 | 0.41                  | 0.09           | 0.17               |
| RCN1                 | ILMN_1800276          | 11   | rs4922579   | 11   | 32136436   | 8    | rs11166957               | 8    | 141177468                | RCN1                | 4.32                                                 | 0.09                  | 0.41           | 0.07               |
| RCN1                 | ILMN_1800276          | 11   | rs4922579   | 11   | 32136436   | 1    | rs1341899                | 1    | 102740645                | RCN1                | 5.40                                                 | 0.04                  | 0.26           | 0.07               |

Continued on next page

Table S1 – continued from previous page

| Gene ID <sup>a</sup> | Expression trait      |      | SNP 1      |      | SNP 2      |      | Interaction statistic / $-\log_{10}P$ -values |                       | Distance / Mpb |                    |       |
|----------------------|-----------------------|------|------------|------|------------|------|-----------------------------------------------|-----------------------|----------------|--------------------|-------|
|                      | Probe ID <sup>b</sup> | Chr. | rs ID      | Chr. | rs ID      | Chr. | BGS <sup>c</sup>                              | Fehrmann <sup>d</sup> |                | EGCUT <sup>e</sup> | MetaK |
| RE                   | ILMN_1802380          | 1    | rs4982958  | 14   | rs24987865 | 1    | rs501786                                      | 5.66                  | 0.61           | 1.23               | 1.17  |
| RERE                 | ILMN_1802380          | 1    | rs7697290  | 4    | 135248366  | 1    | 8501786                                       | 5.74                  | 0.14           | 0.10               | 0.06  |
| RERE                 | ILMN_2327795          | 1    | rs11085829 | 19   | 112174312  | 1    | 8501786                                       | 5.74                  | 0.21           | 0.33               | 0.21  |
| RERE                 | ILMN_2327795          | 1    | rs3852011  | 3    | 132844086  | 1    | 8501786                                       | 5.71                  | 0.08           | 0.60               | 0.26  |
| RNASE6               | ILMN_1780533          | 14   | rs11628398 | 14   | 21182800   | 13   | 100601327                                     | 5.48                  | 0.42           | 0.21               | 0.26  |
| RNASE6               | ILMN_1780533          | 14   | rs6603134  | 19   | 83106521   | 14   | 21182800                                      | 5.11                  | 0.09           | 0.22               | 0.08  |
| RNASE6               | ILMN_1794756          | 17   | rs4562488  | 17   | 48169966   | 13   | 36348968                                      | 4.52                  | 0.71           | 0.30               | 0.64  |
| RNF167               | ILMN_1738347          | 17   | rs1107121  | 21   | 46137549   | 17   | 36348968                                      | 6.29                  | 0.11           | 0.30               | 0.13  |
| RNF167               | ILMN_1738347          | 17   | rs8071611  | 17   | 67153886   | 1    | 201983242                                     | 4.32                  | 1.48           | 0.52               | 1.28  |
| RNF167               | ILMN_1738347          | 17   | rs3529385  | 16   | 89648580   | 16   | 201983242                                     | 4.98                  | 3.79           | 14.41              | 17.24 |
| RPL13                | ILMN_2143278          | 16   | rs1401202  | 16   | 80320056   | 16   | 89648580                                      | 5.55                  | 0.13           | 0.73               | 0.38  |
| RPL36AL              | ILMN_2222750          | 2    | rs1401202  | 16   | 80320056   | 2    | 114450028                                     | 5.46                  | 0.09           | 0.06               | 0.02  |
| RPL36AL              | ILMN_2189983          | 14   | rs3007033  | 14   | 50103816   | 9    | 138038093                                     | 5.86                  | 0.32           | 0.20               | 0.19  |
| RPL36AL              | ILMN_2189983          | 14   | rs4900928  | 14   | 50020817   | 6    | 66137260                                      | 4.59                  | 0.10           | 0.37               | 0.15  |
| RPL8                 | ILMN_1764721          | 8    | rs2958482  | 8    | 145984615  | 1    | 23458790                                      | 4.33                  | 0.13           | 0.45               | 0.22  |
| RPL8                 | ILMN_1764721          | 8    | rs4143674  | 20   | 47411304   | 8    | 145984615                                     | 6.48                  | 0.22           | 1.73               | 1.17  |
| SEC13                | ILMN_3297880          | 3    | rs4889214  | 16   | 80913946   | 3    | 10342876                                      | 5.70                  | 0.02           | 0.51               | 1.15  |
| SEMA4A               | ILMN_1702787          | 1    | rs17085428 | 5    | 95388015   | 11   | 156147326                                     | 5.50                  | 0.22           | 0.51               | 1.15  |
| SEMA4A               | ILMN_1694027          | 11   | rs12147460 | 14   | 104412137  | 11   | 94906111                                      | 5.67                  | 0.31           | 0.06               | 0.10  |
| SESN3                | ILMN_1694027          | 11   | rs355391   | 15   | 465911793  | 11   | 94906111                                      | 5.60                  | 0.21           | 0.51               | 0.31  |
| SESN3                | ILMN_1694027          | 11   | rs684856   | 11   | 43893658   | 8    | 134606425                                     | 5.52                  | 0.70           | 0.12               | 0.35  |
| SH3FGR12             | ILMN_1762764          | 6    | rs10838191 | 11   | 43893658   | 3    | 56849749                                      | 5.97                  | 0.20           | 0.51               | 0.30  |
| SH3FGR12             | ILMN_1762764          | 6    | rs2545385  | 5    | 66383979   | 3    | 56849749                                      | 5.23                  | 0.32           | 0.18               | 0.13  |
| SH3FGR12             | ILMN_1762764          | 6    | rs6845304  | 4    | 82860502   | 3    | 56849749                                      | 7.40                  | 0.22           | 0.18               | 0.13  |
| SH3GLB2              | ILMN_2158536          | 9    | rs1034120  | 21   | 18196922   | 9    | 131785569                                     | 5.17                  | 0.09           | 0.24               | 0.09  |
| SH3GLB2              | ILMN_2158536          | 9    | rs1535286  | 20   | 8670835    | 4    | 69428836                                      | 5.47                  | 0.09           | 0.24               | 0.09  |
| SLOC29A18            | ILMN_2382505          | 11   | rs367035   | 19   | 59181708   | 11   | 29428836                                      | 5.70                  | 0.15           | 0.10               | 0.06  |
| SLOC29A18            | ILMN_2382505          | 11   | rs367035   | 11   | 2932826    | 7    | 153224170                                     | 6.15                  | 0.39           | 0.13               | 0.19  |
| SLOC29A18            | ILMN_2382505          | 11   | rs1912136  | 11   | 2932826    | 2    | 241678528                                     | 5.88                  | 1.10           | 0.82               | 1.24  |
| SLOC41A3             | ILMN_1745778          | 3    | rs1912136  | 11   | 24616743   | 3    | 125801067                                     | 5.95                  | 0.86           | 0.07               | 0.40  |
| SLOC41A3             | ILMN_1745778          | 3    | rs6985508  | 8    | 142337734  | 5    | 174598073                                     | 5.52                  | 0.09           | 0.58               | 0.26  |
| SLOC46A3             | ILMN_1658639          | 13   | rs949805   | 17   | 56602091   | 13   | 29259349                                      | 6.52                  | 0.17           | 0.09               | 0.06  |
| SMG7                 | ILMN_1776530          | 1    | rs8035259  | 15   | 97403923   | 1    | 183489203                                     | 6.52                  | 0.17           | 0.09               | 0.06  |
| SMOX                 | ILMN_1776530          | 1    | rs8118315  | 20   | 4161500    | 2    | 65800982                                      | 5.68                  | 0.39           | 0.62               | 0.52  |
| SMOX                 | ILMN_3306349          | 4    | rs1105621  | 9    | 133050233  | 4    | 119225940                                     | 6.11                  | 0.29           | 1.03               | 0.72  |
| SNHGS                | ILMN_1799381          | 11   | rs1520429  | 15   | 46259108   | 11   | 17291499                                      | 6.08                  | 0.29           | 1.03               | 0.72  |
| SNORD14A             | ILMN_1799381          | 11   | rs2634462  | 11   | 17339127   | 11   | 17015557                                      | 7.31                  | 13.11          | 10.96              | 23.22 |
| SNORD89              | ILMN_3238662          | 2    | rs10445863 | 2    | 115929241  | 2    | 101889306                                     | 6.08                  | 0.29           | 1.03               | 0.72  |
| SNORD89              | ILMN_3238662          | 2    | rs11605822 | 11   | 122986326  | 2    | 101889306                                     | 5.96                  | 0.13           | 0.41               | 0.83  |
| SNORD89              | ILMN_3238662          | 2    | rs2135064  | 5    | 26778066   | 2    | 101889306                                     | 6.45                  | 0.34           | 0.00               | 0.06  |
| SNUPN                | ILMN_1733992          | 15   | rs8134646  | 21   | 46376528   | 16   | 81888905                                      | 5.59                  | 0.13           | 0.41               | 0.83  |
| SNUPN                | ILMN_2364535          | 15   | rs8134646  | 21   | 46376528   | 3    | 193706323                                     | 5.44                  | 0.34           | 0.00               | 0.06  |
| SPATA5L1             | ILMN_1729179          | 15   | rs1311620  | 19   | 41117869   | 15   | 45632086                                      | 5.69                  | 0.67           | 0.12               | 0.33  |
| SPATA5L1             | ILMN_1729179          | 15   | rs2221406  | 13   | 9014526    | 1    | 22009713                                      | 5.81                  | 0.17           | 0.09               | 0.06  |
| STYXL1               | ILMN_2345142          | 20   | rs11700639 | 14   | 16153117   | 1    | 77006620                                      | 5.81                  | 0.17           | 0.09               | 0.06  |
| SULF2                | ILMN_2345142          | 20   | rs11700639 | 20   | 46153118   | 1    | 180439266                                     | 5.81                  | 0.17           | 0.09               | 0.06  |
| SULF1A4              | ILMN_2336183          | 16   | rs1463965  | 18   | 74332954   | 16   | 28550667                                      | 7.05                  | 0.46           | 0.24               | 0.30  |
| SULF1A4              | ILMN_2336183          | 16   | rs1463965  | 21   | 40119768   | 16   | 28550667                                      | 5.83                  | 0.16           | 0.05               | 0.00  |
| SURF6                | ILMN_1738032          | 9    | rs6096626  | 20   | 56013994   | 9    | 136281753                                     | 6.14                  | 0.26           | 0.16               | 0.14  |
| SYTL2                | ILMN_2036609          | 11   | rs1375719  | 13   | 103410782  | 11   | 85495269                                      | 5.47                  | 0.28           | 0.31               | 0.24  |
| THBS3                | ILMN_1804663          | 1    | rs1939875  | 11   | 95422867   | 1    | 155162967                                     | 5.55                  | 0.03           | 0.31               | 0.24  |
| THBS3                | ILMN_1804663          | 1    | rs8014956  | 14   | 20687978   | 1    | 155194980                                     | 5.65                  | 0.31           | 0.76               | 0.55  |
| TIPRL                | ILMN_1781457          | 1    | rs2823245  | 21   | 16745523   | 1    | 168154599                                     | 5.22                  | 0.07           | 0.40               | 0.15  |

Continued on next page



Table S1 – continued from previous page

| Expression trait     |                       |      | SNP 1      |      |                     | SNP 2                    |            |      | Interaction statistics / = log <sub>10</sub> p-values |                          |       |                       |                    |       |                            |
|----------------------|-----------------------|------|------------|------|---------------------|--------------------------|------------|------|-------------------------------------------------------|--------------------------|-------|-----------------------|--------------------|-------|----------------------------|
| Gene ID <sup>a</sup> | Probe ID <sup>b</sup> | Chr. | rs ID      | Chr. | Pos/Mb <sup>c</sup> | Association <sup>d</sup> | rs ID      | Chr. | Pos/Mb <sup>c</sup>                                   | Association <sup>d</sup> | BSGSe | Fehrmann <sup>e</sup> | EGCUT <sup>f</sup> | MetaK | Distance / Mb <sup>h</sup> |
| UBASH3A              | ILMN-2338348          | 21   | rs1893592  | 21   | 43855067            | UBASH3A                  | rs7201194  | 16   | 83600397                                              |                          | 5.91  | 0.59                  | 0.42               | 0.52  |                            |
| UBASH3A              | ILMN-2338348          | 21   | rs1893592  | 21   | 43855067            | UBASH3A                  | rs7512594  | 1    | 214514361                                             |                          | 6.01  | 0.48                  | 1.29               | 1.10  |                            |
| USP36                | ILMN-1697227          | 17   | rs2279308  | 17   | 76794981            | USP36                    | rs7223546  | 17   | 75151717                                              |                          | 5.71  | 0.03                  | 0.14               | 0.03  | 1.643                      |
| VASP                 | ILMN-1743646          | 19   | rs1264226  | 19   | 46063167            |                          | rs2276470  | 19   | 45974608                                              |                          | 5.09  | 0.94                  | 5.14               | 4.95  | 0.088                      |
| VNN2                 | ILMN-1678939          | 6    | rs10435352 | 7    | 106242718           |                          | rs1883613  | 6    | 133077063                                             | VNN2                     | 5.64  | 0.84                  | 0.15               | 0.46  |                            |
| VNN2                 | ILMN-1678939          | 6    | rs13044386 | 20   | 9116135             |                          | rs1883617  | 6    | 133077500                                             | VNN2                     | 5.44  | 0.39                  | 0.69               | 0.57  |                            |
| VNN2                 | ILMN-1678939          | 6    | rs9354495  | 22   | 4851432             |                          | rs1883617  | 6    | 133077500                                             | VNN2                     | 5.72  | 0.33                  | 0.19               | 0.19  |                            |
| VNN2                 | ILMN-1678939          | 6    | rs164495   | 17   | 16841514            |                          | rs2267952  | 6    | 133077860                                             | VNN2                     | 5.77  | 0.16                  | 0.74               | 0.41  |                            |
| VNN3                 | ILMN-1804935          | 6    | rs10278073 | 7    | 151662184           |                          | rs2267952  | 6    | 133067782                                             | VNN3                     | 6.44  | 0.23                  | 0.48               | 0.31  |                            |
| VNN3                 | ILMN-1804935          | 6    | rs1443946  | 6    | 73006453            |                          | rs2267952  | 6    | 133067782                                             | VNN3                     | 5.74  | 0.31                  | 0.17               | 0.17  |                            |
| VNN3                 | ILMN-1804935          | 6    | rs348462   | 9    | 75547169            |                          | rs2267952  | 6    | 133067782                                             | VNN3                     | 6.44  | 0.03                  | 0.03               | 0.04  |                            |
| VNN3                 | ILMN-1804935          | 6    | rs7157055  | 14   | 83262064            |                          | rs2267952  | 6    | 133067782                                             | VNN3                     | 5.82  | 0.73                  | 1.15               | 1.21  |                            |
| VNN3                 | ILMN-2387680          | 6    | rs2823165  | 21   | 16594253            |                          | rs2267952  | 6    | 133067782                                             | VNN3                     | 6.12  | 0.46                  | 0.05               | 0.16  |                            |
| VNN3                 | ILMN-2387680          | 6    | rs9596457  | 13   | 51692548            |                          | rs2267952  | 6    | 133067782                                             | VNN3                     | 4.83  | 0.76                  | 0.54               | 0.57  |                            |
| VSTM1                | ILMN-1763455          | 19   | rs10500316 | 19   | 54553697            | VSTM1                    | rs4552100  | 18   | 71024750                                              |                          | 5.60  | 0.53                  | 0.48               | 0.17  | 0.26                       |
| VSTM1                | ILMN-1763455          | 19   | rs10500316 | 19   | 54553697            | VSTM1                    | rs7895870  | 10   | 123098249                                             |                          | 5.71  | 0.81                  | 1.38               | 1.47  |                            |
| VSTM1                | ILMN-1763455          | 19   | rs9625870  | 22   | 30261219            |                          | rs10500316 | 19   | 54553697                                              | VSTM1                    | 5.88  | 0.19                  | 0.13               | 0.09  |                            |
| WDR48                | ILMN-1762103          | 3    | rs1388935  | 4    | 188927822           |                          | rs6778963  | 3    | 39091812                                              | WDR48                    | 6.34  | 0.57                  | 1.35               | 1.22  |                            |
| WDR48                | ILMN-1762103          | 3    | rs1887778  | 9    | 134683088           |                          | rs8833349  | 3    | 39067925                                              | WDR48                    | 5.85  | 0.18                  | 1.64               | 1.43  |                            |
| WDR48                | ILMN-1762103          | 3    | rs9554833  | 13   | 102624790           | RAPGEF1                  | rs7619193  | 3    | 39044116                                              | WDR48                    | 4.86  | 1.64                  | 1.43               | 2.25  |                            |
| WDR6                 | ILMN-1669484          | 3    | rs12362253 | 11   | 123371708           |                          | rs11715581 | 3    | 49194331                                              | WDR6                     | 5.48  | 2.38                  | 0.17               | 1.63  |                            |
| XAF1                 | ILMN-2370573          | 17   | rs1533031  | 17   | 6673170             | XAF1                     | rs12591171 | 15   | 93119799                                              |                          | 5.79  | 0.09                  | 0.36               | 0.15  |                            |
| ZFP90                | ILMN-1684628          | 16   | rs09446    | 21   | 37040648            |                          | rs1182968  | 16   | 68573945                                              | ZFP90                    | 5.29  | 0.67                  | 0.27               | 0.46  |                            |
| ZNF500               | ILMN-1700238          | 16   | rs4823723  | 22   | 48283177            |                          | rs2290560  | 16   | 47939041                                              | ZNF500                   | 6.04  | 0.26                  | 0.01               | 0.05  |                            |
| ZYX                  | ILMN-1701879          | 7    | rs6056281  | 20   | 8955312             |                          | rs2242601  | 7    | 143093824                                             | ZYX                      |       |                       |                    |       |                            |

<sup>a</sup> Phenotypes are expression levels of RefSeq Genes

<sup>b</sup> Illumina probe ID used to measure gene expression

<sup>c</sup> Physical SNP position in base pairs (HG19)

<sup>d</sup> RefSeq Gene ID of gene expression level that is influenced by the SNP (BSGSe discovery dataset, significance threshold = 1.29 × 10<sup>-11</sup>)

<sup>e</sup> Interaction – log<sub>10</sub> p-value from discovery dataset

<sup>f</sup> Interaction – log<sub>10</sub> p-value from replication dataset

<sup>g</sup> Interaction – log<sub>10</sub> p-value from meta analysis of replication datasets only

<sup>h</sup> Distance in Mb between interacting SNPs for *cis-cis* acting SNP pairs

<sup>i</sup> p-values are absent if the interaction did not pass the QC filtering in the replication dataset.

<sup>j</sup> Meta analysis p-values are absent if the interaction did not pass the QC filtering in either replication dataset

Table S2: **Estimation of additive and non-additive variance components from pedigree information** Taken from previous analysis in Powell et al 2013<sup>22</sup>

| Gene    | Probe        | Additive |      | Non-additive |      |
|---------|--------------|----------|------|--------------|------|
|         |              | Variance | s.e. | Variance     | s.e. |
| NAPRT1  | ILMN_1710752 | 0.37     | 0.03 | 0.14         | 0.05 |
| TMEM149 | ILMN_1786426 | 0.41     | 0.04 | 0.09         | 0.04 |
| MBNL1   | ILMN_2313158 | 0.18     | 0.03 | 0.11         | 0.04 |
| TRAPPC5 | ILMN_2372639 | 0.32     | 0.04 | 0.13         | 0.05 |
| CAST    | ILMN_1717234 | 0.31     | 0.03 | 0.10         | 0.04 |

Table S3: **Concordance of sign of epistatic variance components between discovery and replication datasets**

| Test           | Interactions <sup>a</sup> | Dataset  | $n^b$ | Expected <sup>c</sup> | Observed <sup>d</sup> | $p$ -value             |
|----------------|---------------------------|----------|-------|-----------------------|-----------------------|------------------------|
| 1 <sup>e</sup> | All                       | EGCUT    | 434   | 217.00                | 306                   | $6.69 \times 10^{-18}$ |
|                |                           | Fehrmann | 434   | 217.00                | 278                   | $5.04 \times 10^{-9}$  |
|                |                           | Both     | 434   | 108.50                | 221                   | $5.56 \times 10^{-31}$ |
|                | Significant               | EGCUT    | 30    | 15.00                 | 25                    | $3.25 \times 10^{-4}$  |
|                |                           | Fehrmann | 30    | 15.00                 | 24                    | $1.43 \times 10^{-3}$  |
|                |                           | Both     | 30    | 7.50                  | 22                    | $3.76 \times 10^{-8}$  |
| 2 <sup>f</sup> | All                       | EGCUT    | 434   | 54.25                 | 92                    | $4.22 \times 10^{-7}$  |
|                |                           | Fehrmann | 434   | 54.25                 | 79                    | $6.18 \times 10^{-4}$  |
|                |                           | Both     | 434   | 6.78                  | 30                    | $2.55 \times 10^{-11}$ |
|                | Significant               | EGCUT    | 30    | 3.75                  | 19                    | $9.46 \times 10^{-11}$ |
|                |                           | Fehrmann | 30    | 3.75                  | 19                    | $9.46 \times 10^{-11}$ |
|                |                           | Both     | 30    | 0.47                  | 18                    | $2.23 \times 10^{-25}$ |
| 3 <sup>g</sup> | All                       | EGCUT    | 1133  | 566.50                | 775                   | $7.10 \times 10^{-36}$ |
|                |                           | Fehrmann | 1133  | 566.50                | 726                   | $1.90 \times 10^{-21}$ |
|                |                           | Both     | 1133  | 283.25                | 562                   | $1.39 \times 10^{-70}$ |
|                | Significant               | EGCUT    | 73    | 36.50                 | 55                    | $1.69 \times 10^{-5}$  |
|                |                           | Fehrmann | 73    | 36.50                 | 55                    | $1.69 \times 10^{-5}$  |
|                |                           | Both     | 73    | 18.25                 | 46                    | $7.86 \times 10^{-12}$ |

<sup>a</sup> “All” denotes 434 discovery interactions and “Significant” denotes 30 interactions with significant replication  $p$ -values

<sup>b</sup> Number of tests for concordance

<sup>c</sup> Expected number of concordant cases under the null hypothesis of no interactions

<sup>d</sup> Observed number of concordant cases

<sup>e</sup> The sign of the most significant epistatic variance component in discovery is the same as the corresponding variance component in the replication data.

<sup>f</sup> The largest epistatic variance component in the discovery is the same as in the replication with the same sign in both.

<sup>g</sup> The sign of all epistatic variance components in the discovery with  $p < 0.05$  are the same as the corresponding variance components in the replication data.

Table S4: **Concordance of sign of epistatic variance components between discovery and replication datasets using test 4**

| Interactions <sup>a</sup> | Dataset  | $n^b$ | 0 <sup>c</sup> | 1 <sup>c</sup> | 2 <sup>c</sup> | 3 <sup>c</sup> | 4 <sup>c</sup> | $p$                   |
|---------------------------|----------|-------|----------------|----------------|----------------|----------------|----------------|-----------------------|
| Expected <sup>d</sup>     | -        | -     | 0.06           | 0.25           | 0.38           | 0.25           | 0.06           | -                     |
| All                       | EGCUT    | 434   | 0.06           | 0.22           | 0.41           | 0.23           | 0.08           | 0.194                 |
| All                       | Fehrmann | 434   | 0.07           | 0.22           | 0.39           | 0.24           | 0.08           | 0.385                 |
| All                       | Combined | 868   | 0.07           | 0.22           | 0.40           | 0.23           | 0.08           | 0.0448                |
| Significant               | EGCUT    | 30    | 0.07           | 0.03           | 0.30           | 0.33           | 0.27           | $4.72 \times 10^{-4}$ |
| Significant               | Fehrmann | 30    | 0.03           | 0.07           | 0.33           | 0.27           | 0.30           | $6.69 \times 10^{-4}$ |
| Significant               | Combined | 60    | 0.05           | 0.05           | 0.32           | 0.30           | 0.28           | $5.49 \times 10^{-8}$ |

<sup>a</sup> “All” denotes 434 discovery interactions and “Significant” denotes 30 interactions with significant replication  $p$ -values.

<sup>b</sup> Number of tests for concordance.

<sup>c</sup> Proportion of tests that have 0, 1, 2, 3 or 4 concordant signs between discovery and replication.

<sup>d</sup> Expected proportion of concordant signs under the null hypothesis of no epistasis.

Table S5: Details on linkage disequilibrium and relative positions of all discovery interactions with SNPs on the same chromosome

| Chr | Gene     | SNP 1      | SNP 2      | Position 1 | Position 2 | Distance / Mb | $R^2$ | $D'$  |
|-----|----------|------------|------------|------------|------------|---------------|-------|-------|
| 19  | TMEM149  | rs807491   | rs7254601  | 36268923   | 36147315   | 0.122         | 0.000 | 0.001 |
| 17  | FN3KRP   | rs898095   | rs9892064  | 80890638   | 80827903   | 0.063         | 0.063 | 0.088 |
| 21  | CSTB     | rs9979356  | rs3761385  | 45230974   | 45198355   | 0.033         | 0.041 | 0.066 |
| 3   | MBNL1    | rs16864367 | rs13079208 | 152234166  | 152116652  | 0.118         | 0.041 | 0.117 |
| 10  | ADK      | rs2395095  | rs10824092 | 76446305   | 75929517   | 0.517         | 0.013 | 0.020 |
| 11  | CTSC     | rs7930237  | rs556895   | 88117962   | 88077479   | 0.040         | 0.012 | 0.045 |
| 17  | GAA      | rs11150847 | rs12602462 | 78153130   | 78146016   | 0.007         | 0.000 | 0.001 |
| 8   | NAPRT1   | rs2123758  | rs3889129  | 144663661  | 144613680  | 0.050         | 0.053 | 0.060 |
| 1   | LAX1     | rs1891432  | rs10900520 | 203877662  | 203780591  | 0.097         | 0.065 | 0.106 |
| 18  | MBP      | rs8092433  | rs4890876  | 74747424   | 74732087   | 0.015         | 0.035 | 0.053 |
| 11  | SNORD14A | rs2634462  | rs6486334  | 17339127   | 17015557   | 0.324         | 0.008 | 0.012 |
| 21  | C21ORF57 | rs9978658  | rs11701361 | 48027084   | 47764477   | 0.263         | 0.032 | 0.065 |
| 16  | RPL13    | rs352935   | rs2965817  | 89648580   | 89513234   | 0.135         | 0.054 | 0.060 |
| 19  | ATP13A1  | rs4284750  | rs873870   | 19810050   | 19738554   | 0.071         | 0.008 | 0.015 |
| 2   | NCL      | rs7563453  | rs4973397  | 232301670  | 232291471  | 0.010         | 0.027 | 0.029 |
| 5   | HNRPH1   | rs6894268  | rs4700810  | 179032488  | 178991794  | 0.041         | 0.000 | 0.001 |
| 19  | VASP     | rs1264226  | rs2276470  | 46063167   | 45974668   | 0.088         | 0.018 | 0.022 |
| 7   | TRA2A    | rs7776572  | rs11770192 | 23528927   | 23498358   | 0.031         | 0.064 | 0.064 |
| 21  | PRMT2    | rs2839372  | rs11701058 | 48063862   | 47776382   | 0.287         | 0.100 | 0.122 |
| 12  | OAS1     | rs13311    | rs2072133  | 113448652  | 113409260  | 0.039         | 0.002 | 0.016 |
| 16  | N4BP1    | rs12444224 | rs11649236 | 87580855   | 48632478   | 38.948        | 0.007 | 0.021 |
| 5   | CAST     | rs12719343 | rs7733671  | 125369113  | 96000269   | 29.369        | 0.001 | 0.001 |
| 7   | DNAJB6   | rs2286842  | rs3779589  | 157216093  | 157163614  | 0.052         | 0.005 | 0.006 |
| 1   | OVGP1    | rs10802822 | rs1264898  | 240132968  | 111992823  | 128.140       | 0.008 | 0.030 |
| 20  | CD93     | rs2868504  | rs1884655  | 37771578   | 23074375   | 14.697        | 0.000 | 0.002 |
| 11  | PHCA     | rs493642   | rs10736812 | 123097386  | 76708086   | 46.389        | 0.002 | 0.008 |
| 21  | MX1      | rs459498   | rs8130120  | 42795027   | 29363604   | 13.431        | 0.000 | 0.000 |
| 16  | AKTIP    | rs2896940  | rs13332406 | 57721127   | 53489705   | 4.231         | 0.000 | 0.001 |
| 17  | CDK5R1   | rs9905940  | rs11655031 | 46614102   | 30833162   | 15.781        | 0.000 | 0.000 |
| 2   | CYBRD1   | rs888427   | rs7591849  | 172368120  | 160112881  | 12.255        | 0.000 | 0.000 |
| 8   | HMBOX1   | rs587639   | rs7837237  | 132725731  | 28876221   | 103.850       | 0.001 | 0.001 |
| 11  | TRAPPC4  | rs1793823  | rs3916581  | 131018917  | 118887887  | 12.131        | 0.001 | 0.002 |
| 12  | PEX5     | rs10444467 | rs4329748  | 128052636  | 7364442    | 120.688       | 0.000 | 0.000 |
| 12  | FLJ20489 | rs17615703 | rs3782908  | 117036766  | 48169526   | 68.867        | 0.001 | 0.002 |
| 16  | PRKCB1   | rs2188355  | rs10492793 | 23867776   | 12639800   | 11.228        | 0.000 | 0.000 |
| 14  | MRPL52   | rs1950857  | rs3811188  | 26710271   | 23299135   | 3.411         | 0.002 | 0.004 |
| 17  | C17ORF60 | rs9907897  | rs7405659  | 63502633   | 59874129   | 3.629         | 0.004 | 0.011 |
| 6   | FLJ43093 | rs6906101  | rs13214069 | 36667610   | 32705248   | 3.962         | 0.000 | 0.000 |
| 19  | TRAPPC5  | rs17159840 | rs17763599 | 7758194    | 2369415    | 5.389         | 0.000 | 0.000 |
| 22  | PISD     | rs715572   | rs6518754  | 33234931   | 32097775   | 1.137         | 0.001 | 0.003 |
| 12  | DIP2B    | rs871257   | rs12427378 | 117994348  | 51074199   | 66.920        | 0.001 | 0.001 |
| 12  | GPR162   | rs2272500  | rs2707210  | 79685913   | 6902002    | 72.784        | 0.003 | 0.005 |
| 17  | USP36    | rs2279308  | rs7225546  | 76794981   | 75151717   | 1.643         | 0.000 | 0.000 |
